# Supplementary material
Source: PubMed Central journal article supplement (PMC2577592)
Supplement: NIHMS43114-supplement-02.pdf [file NIHMS43114-supplement-02.pdf]

**Allene-alkyne cross-coupling for stereoselective  
synthesis of substituted 1,4-dienes and cross-  
conjugated trienes**

Heidi L. Shimp, Alissa Hare, Martin McLaughlin and Glenn C. Micalizio

**SUPPORTING INFORMATION-2:**

**Spectral Data for Compounds 14, 15, 17, 19-23, 25, 27,  
30, 35, 37, 39-41, 43-48, 50 and 52.**

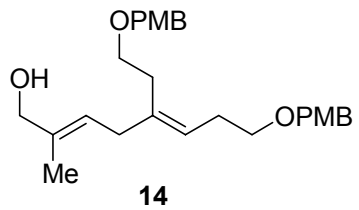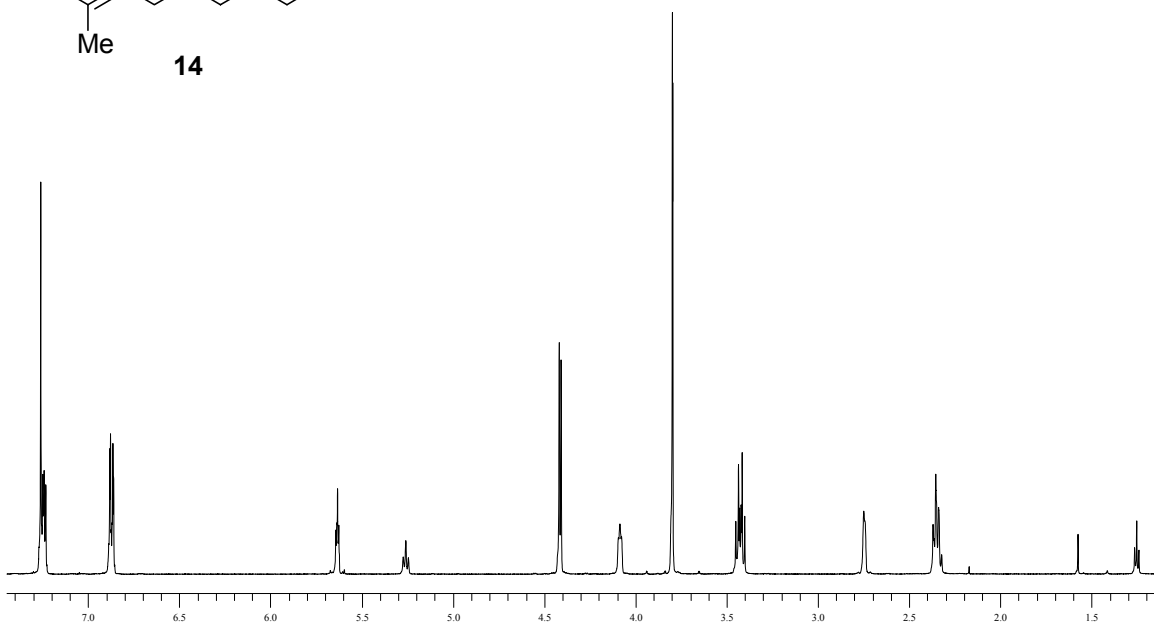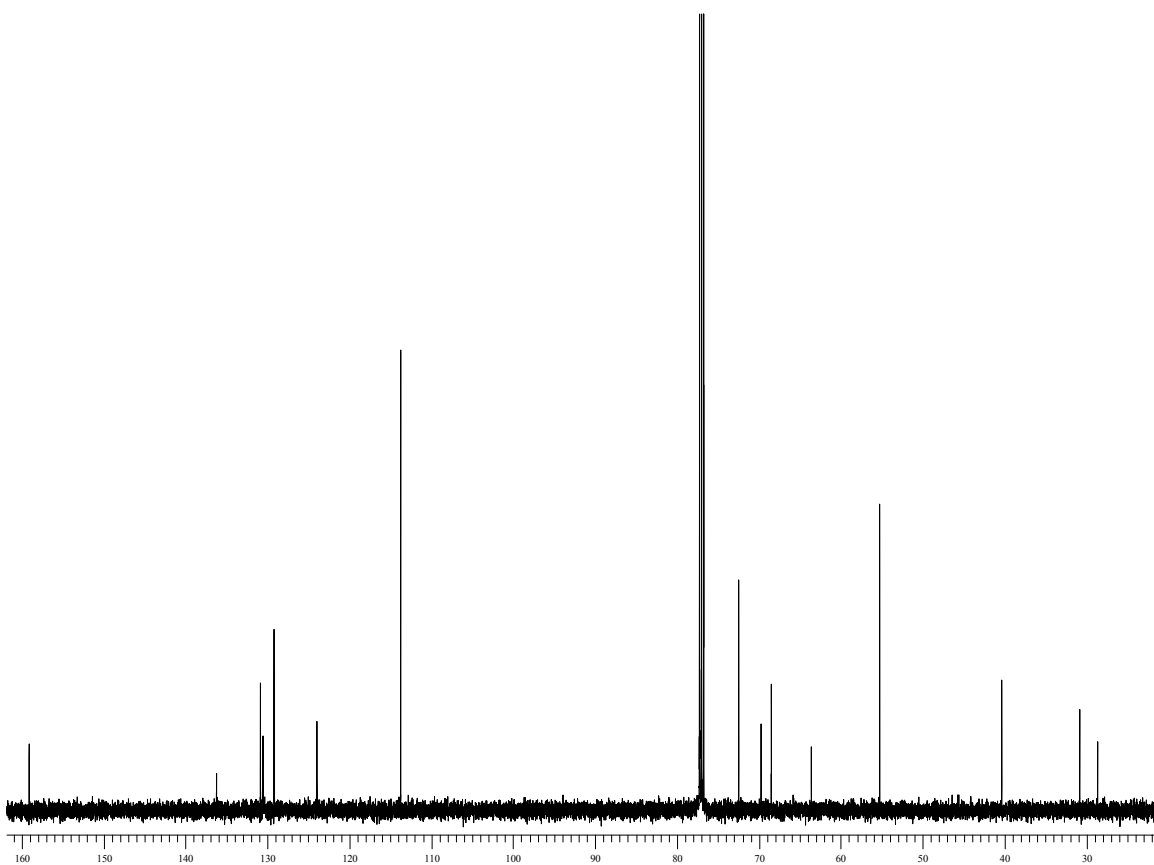

$^1\text{H}$  (500 MHz) and  $^{13}\text{C}$  (126 MHz) of compound **14** ( $\text{CDCl}_3$ )

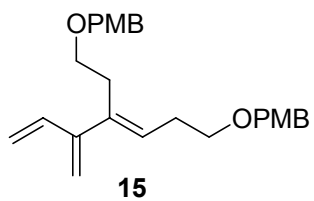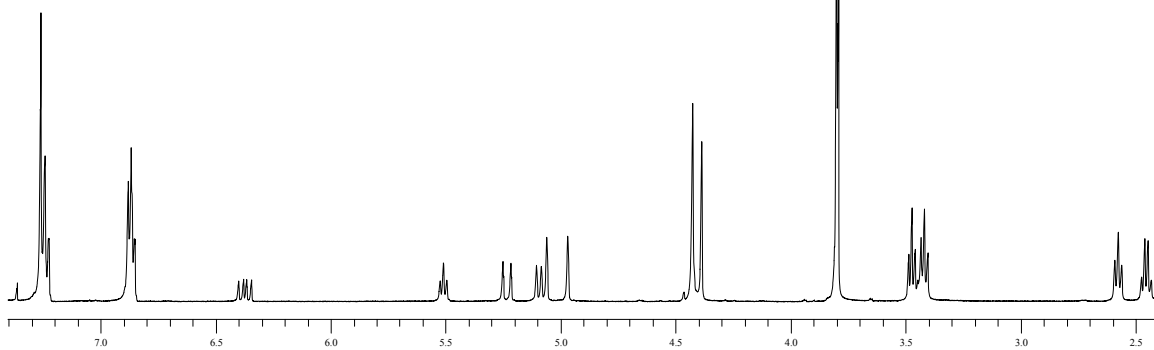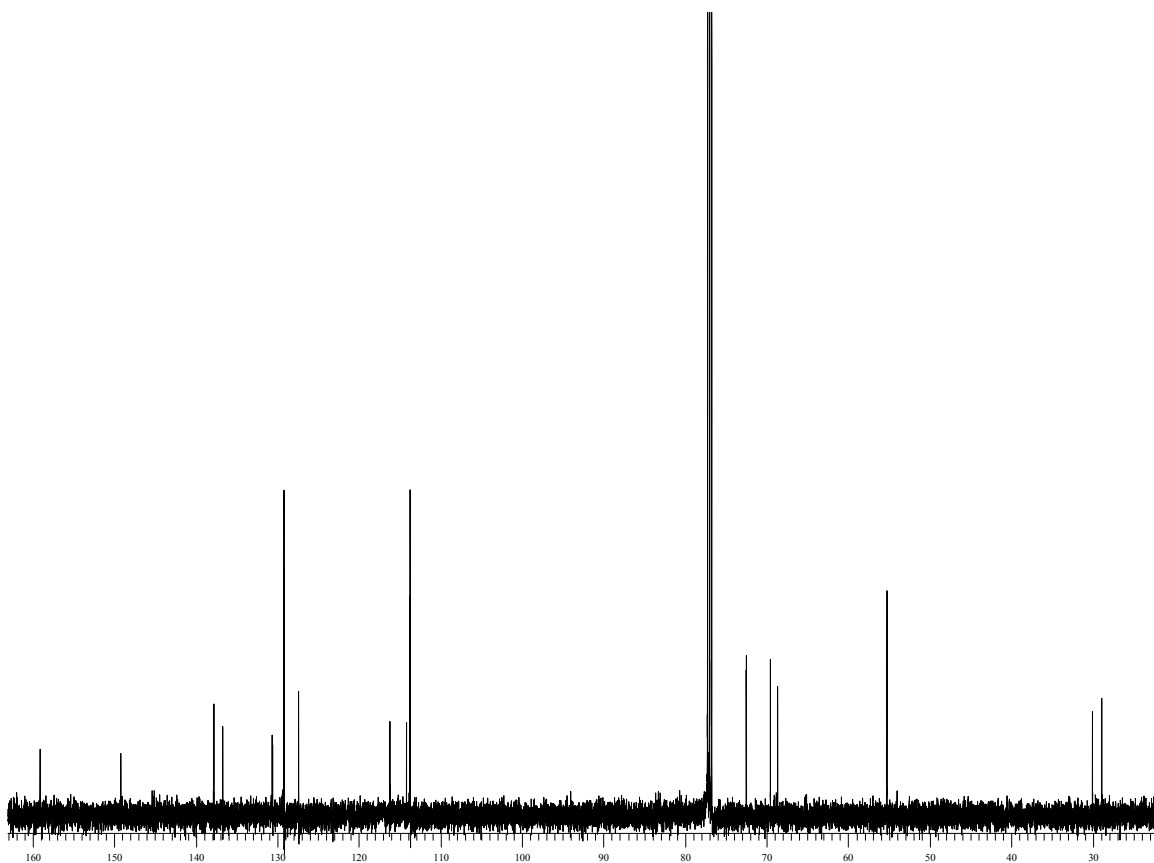

$^1\text{H}$  (500 MHz) and  $^{13}\text{C}$  (126 MHz) of compound **15** ( $\text{CDCl}_3$ )

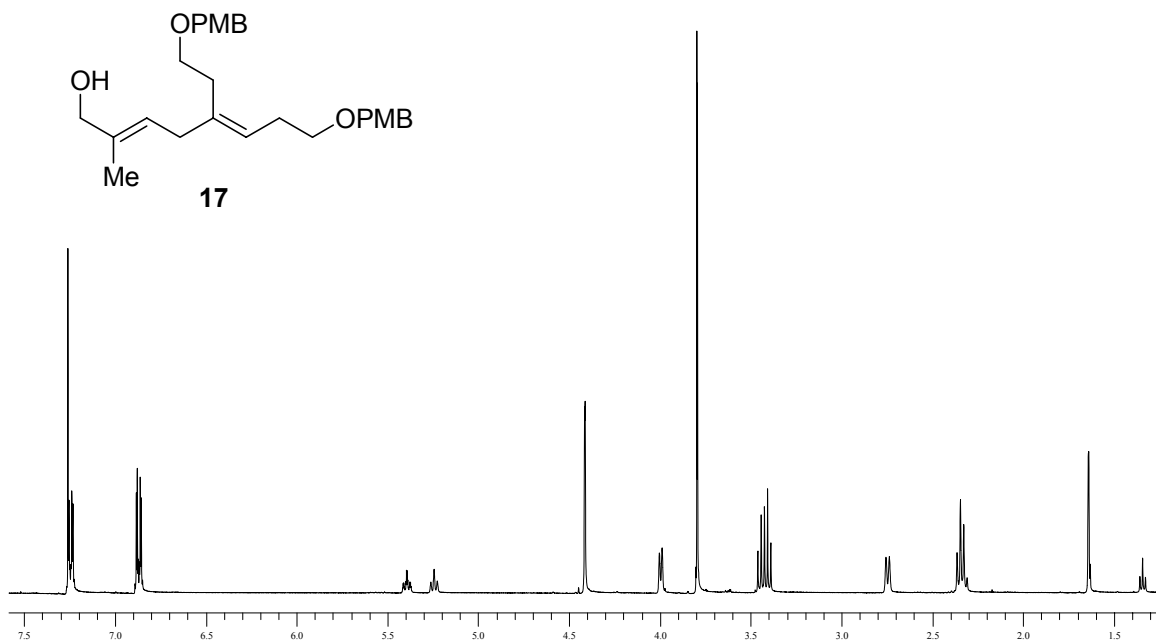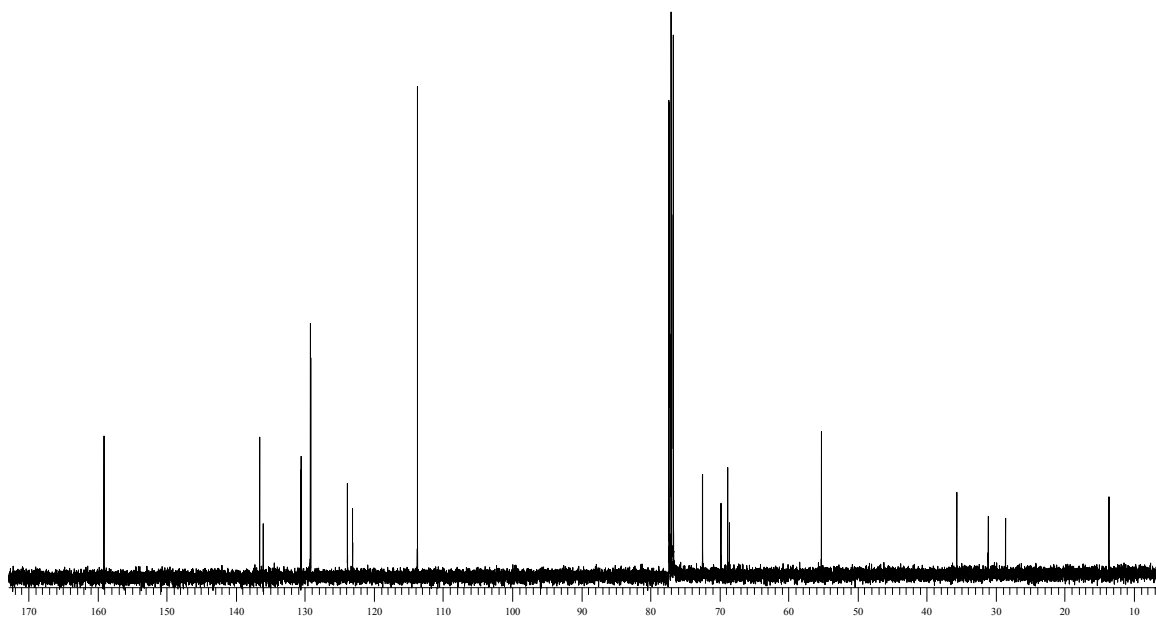

$^1\text{H}$  (400 MHz) and  $^{13}\text{C}$  (100 MHz) of compound **17** ( $\text{CDCl}_3$ )

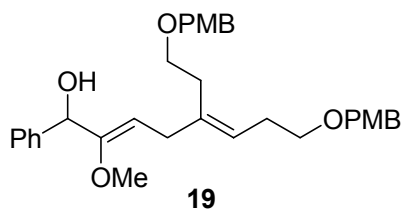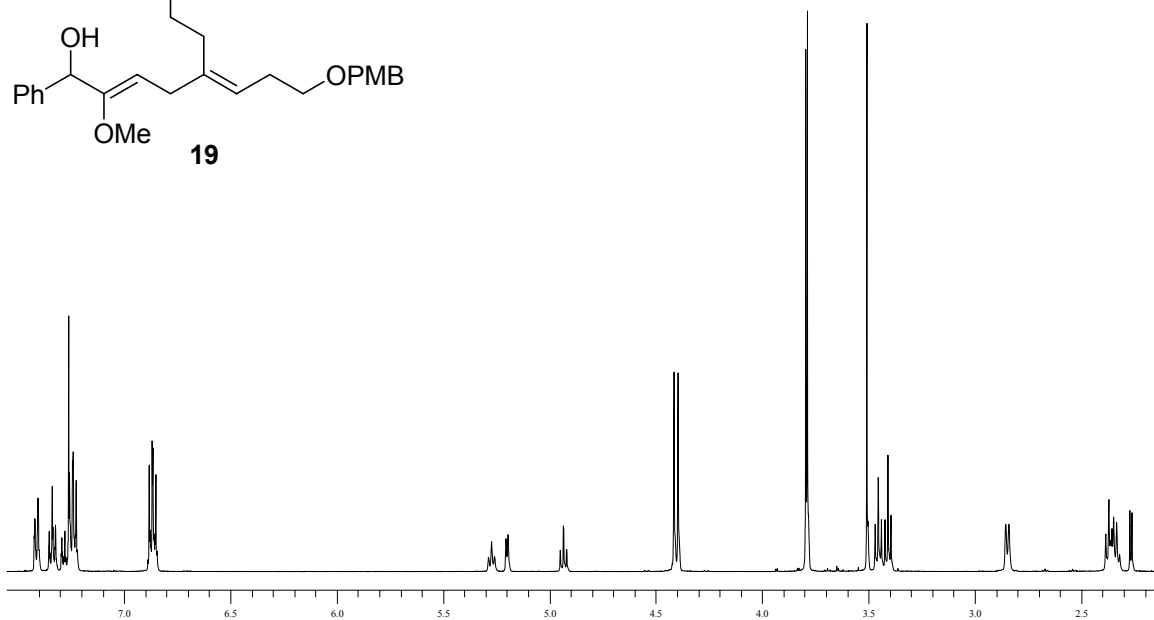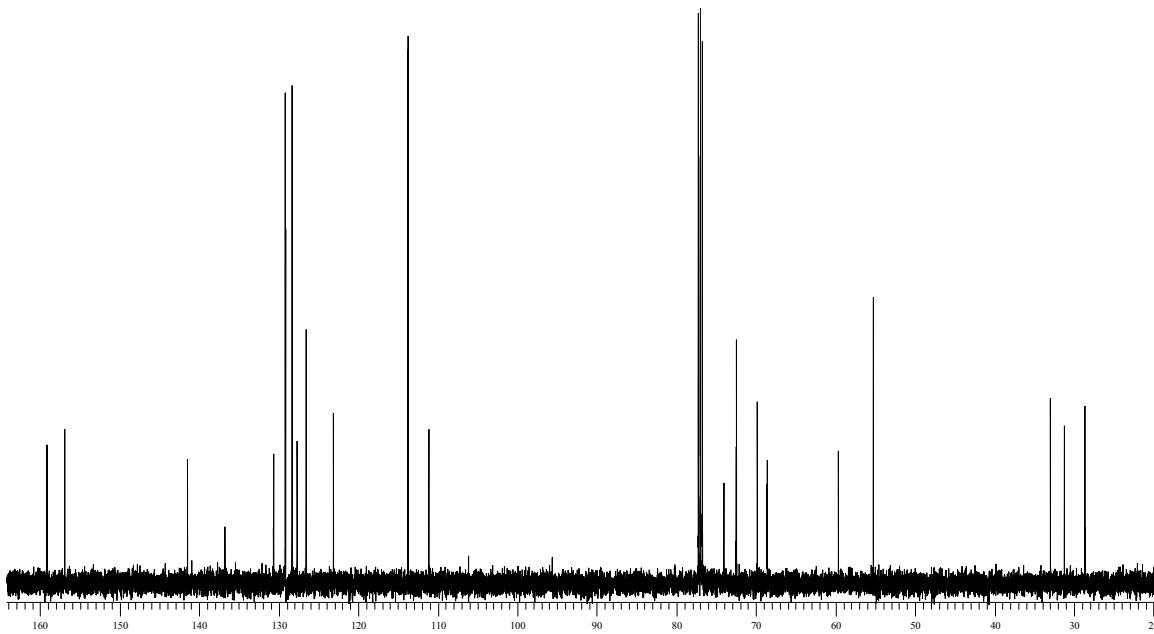

$^1\text{H}$  (500 MHz) and  $^{13}\text{C}$  (126 MHz) of compound **19** ( $\text{CDCl}_3$ )

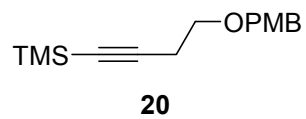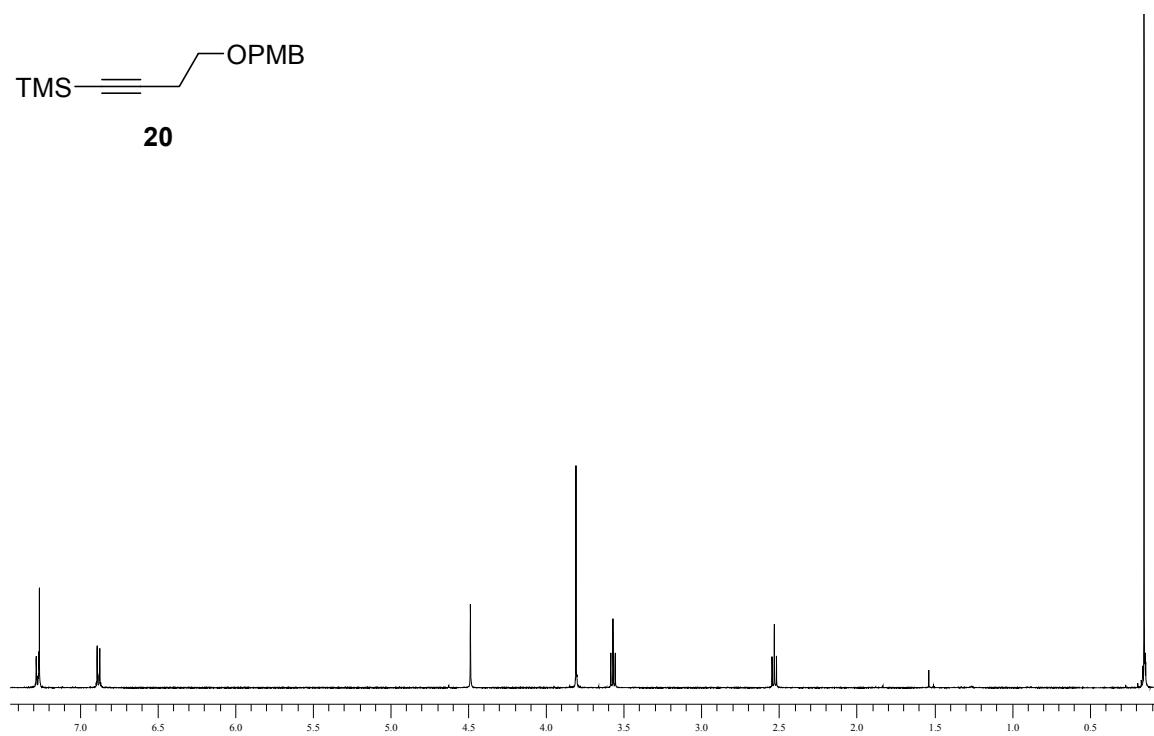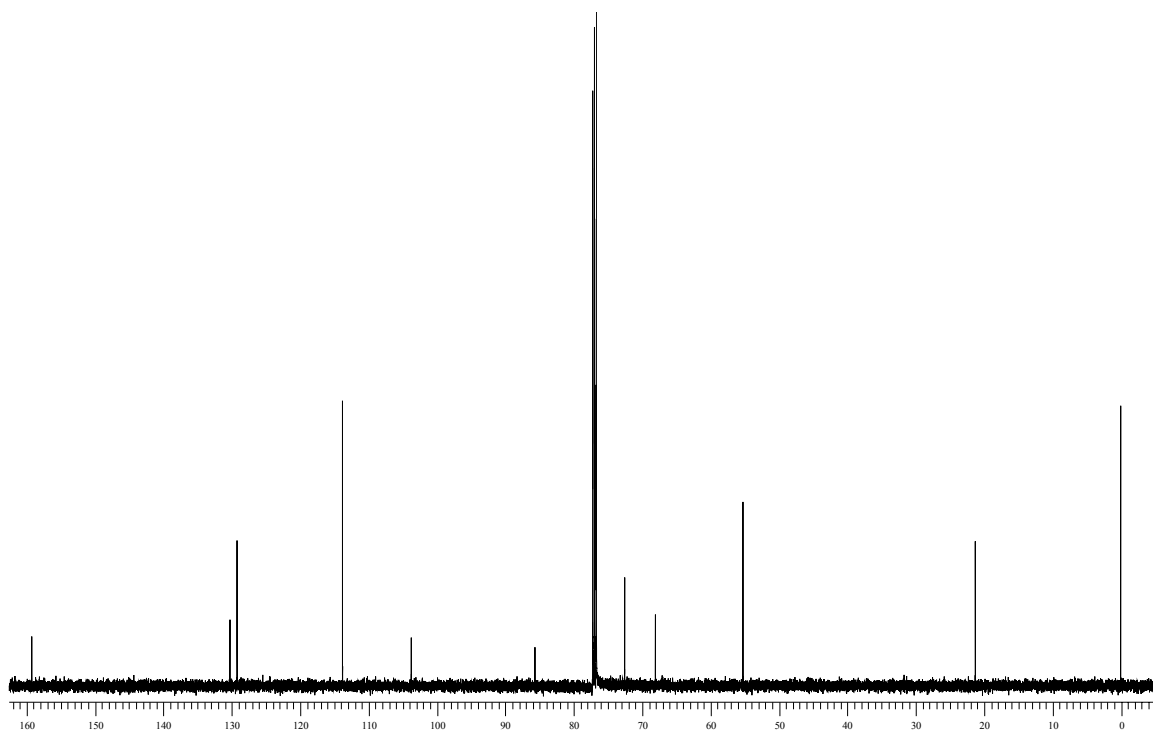

$^1\text{H}$  (500 MHz) and  $^{13}\text{C}$  (126 MHz) of compound **20** ( $\text{CDCl}_3$ )

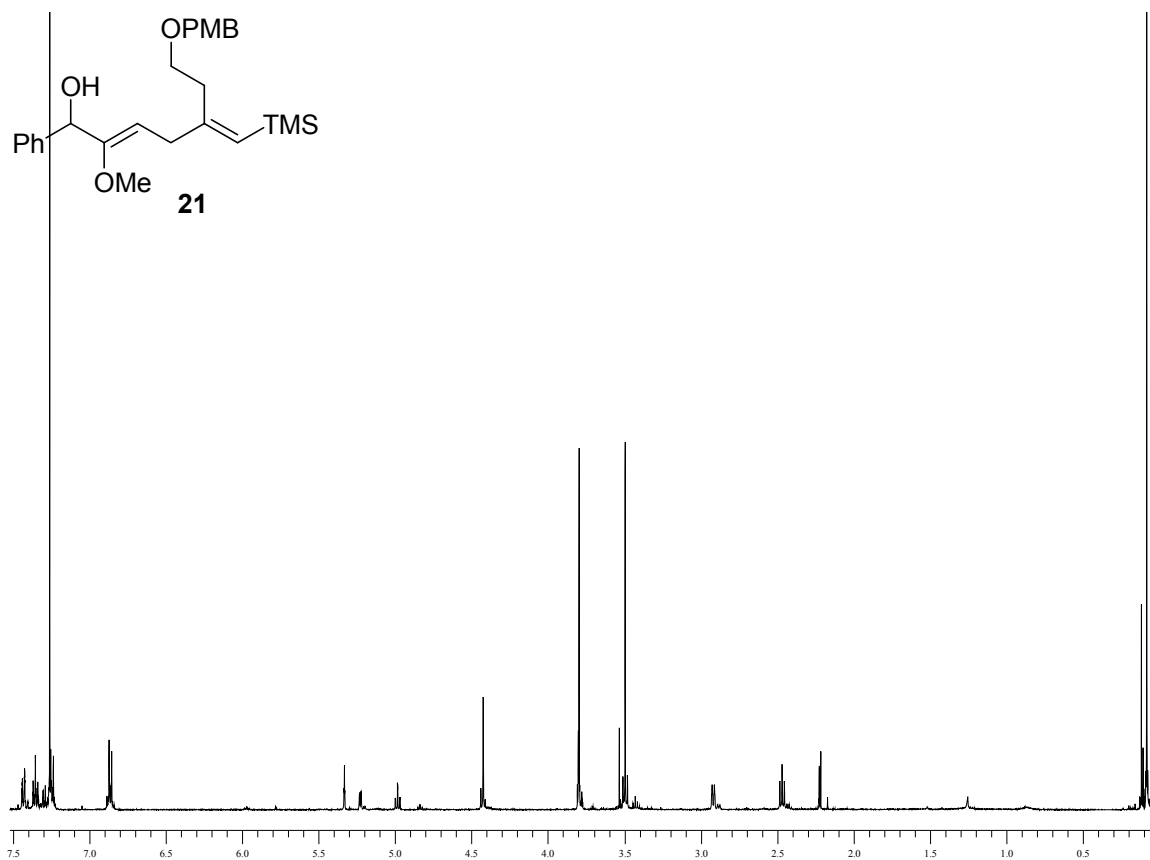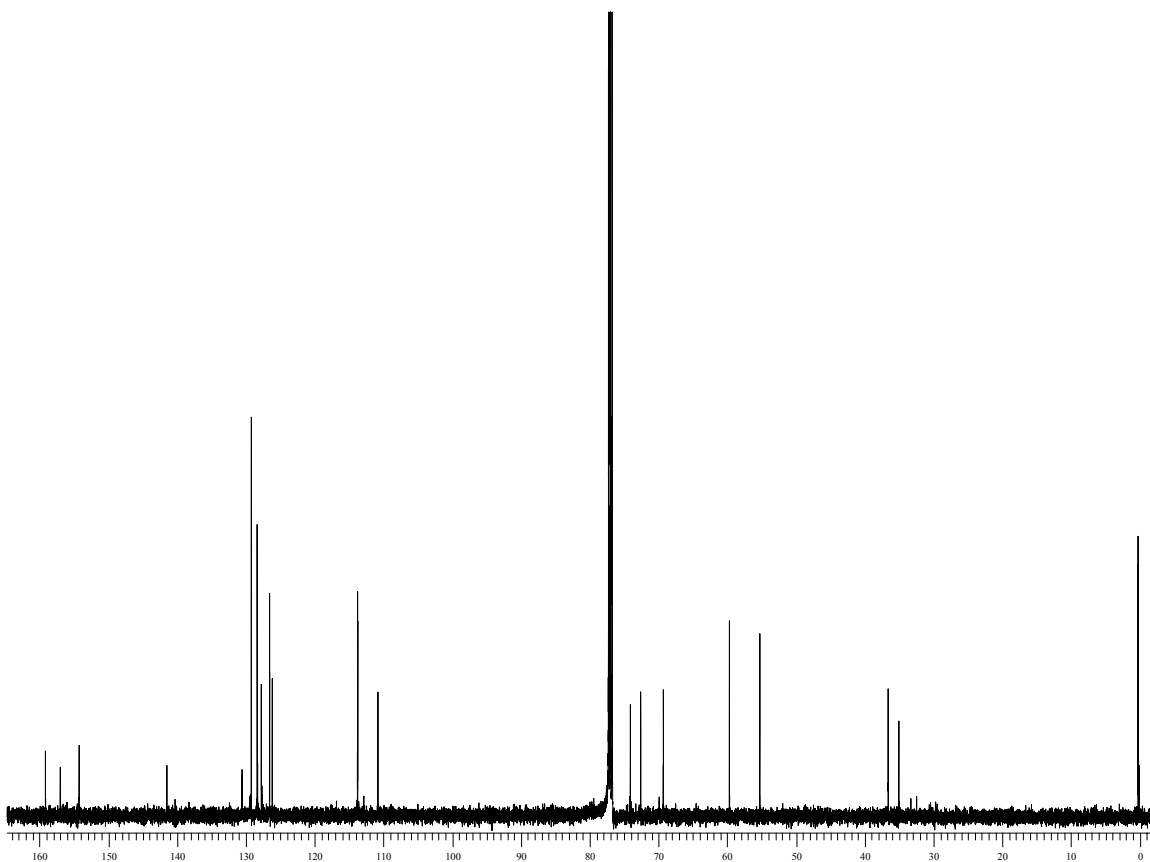

$^1\text{H}$  (500 MHz) and  $^{13}\text{C}$  (126 MHz) of compound **21** ( $\text{CDCl}_3$ )

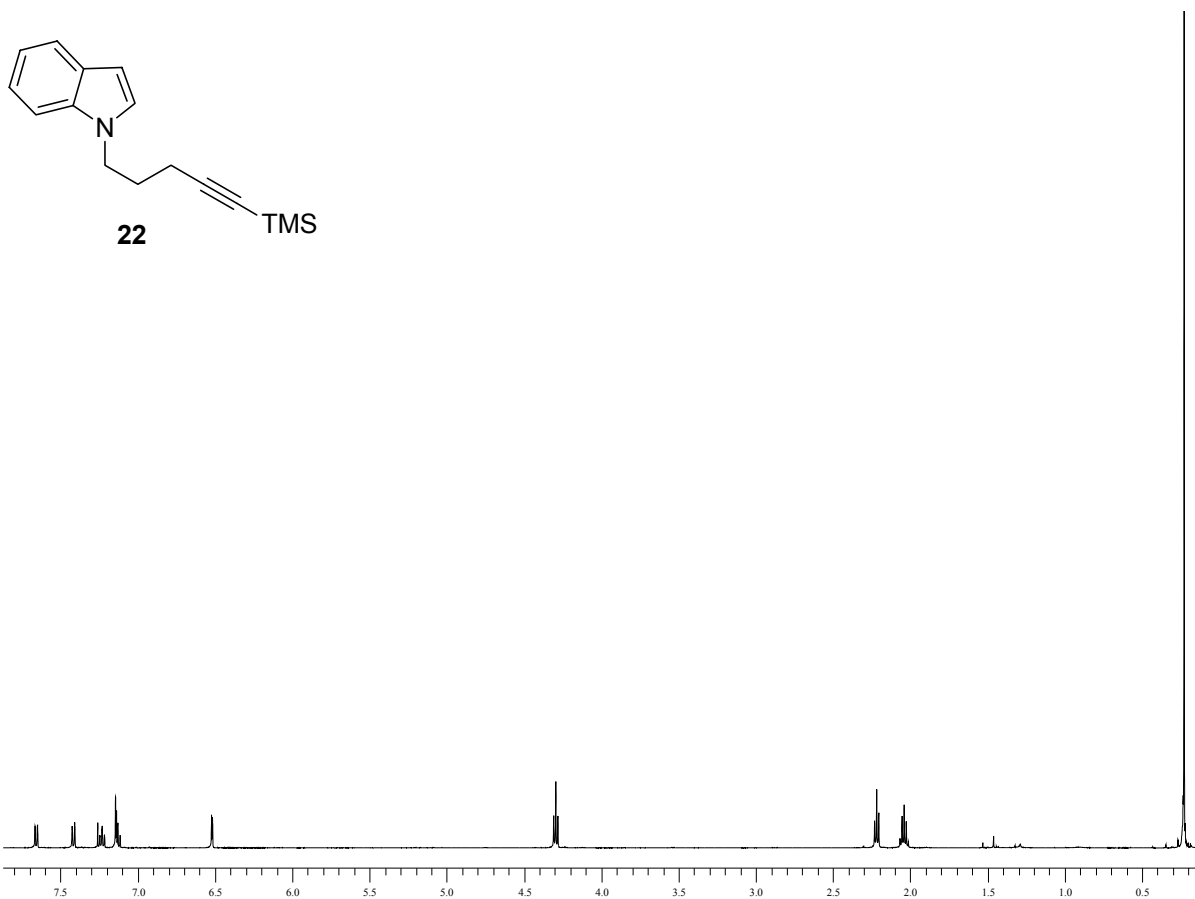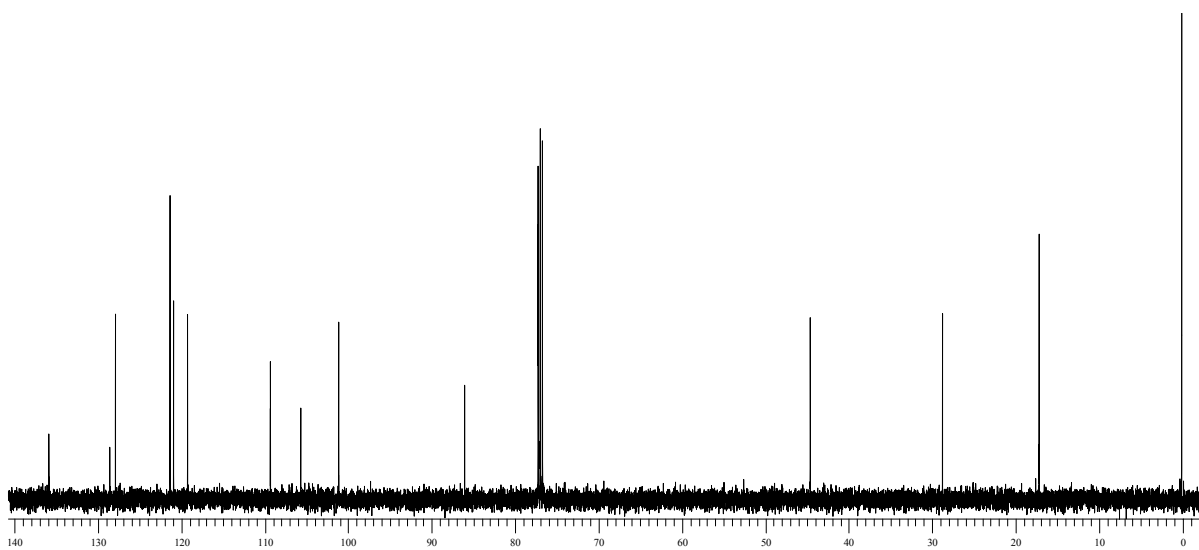

$^1\text{H}$  (500 MHz) and  $^{13}\text{C}$  (126 MHz) of compound **22** ( $\text{CDCl}_3$ )



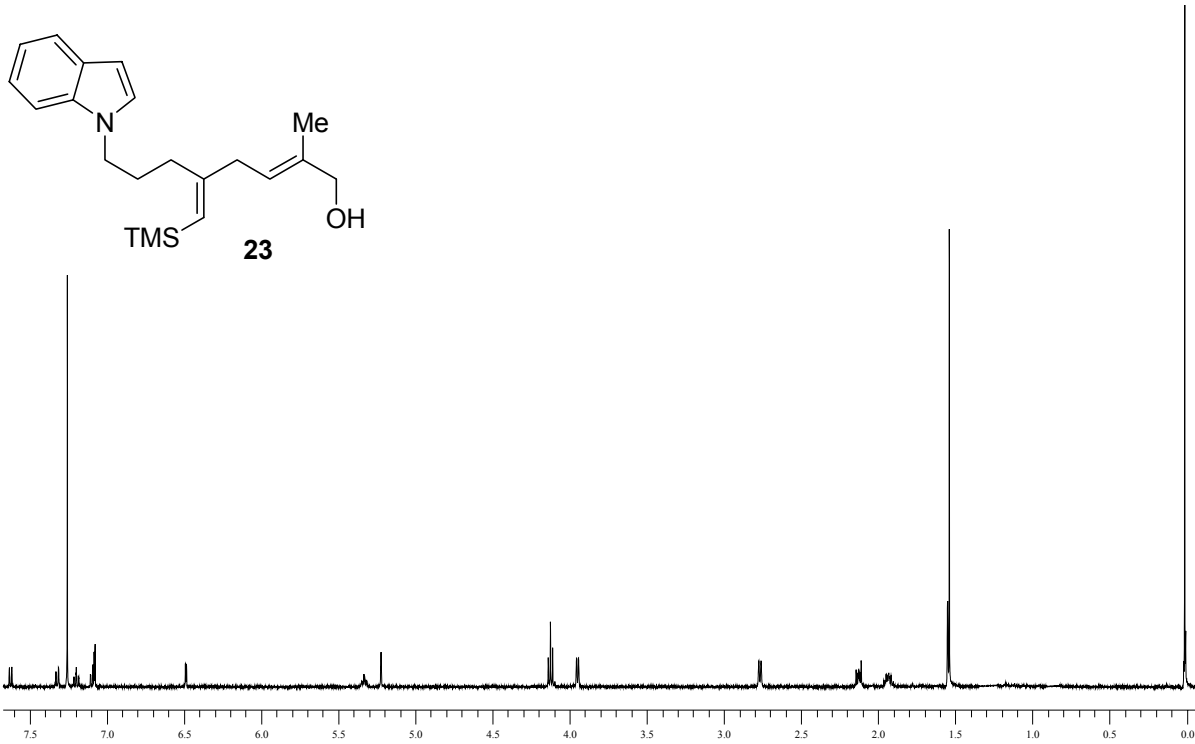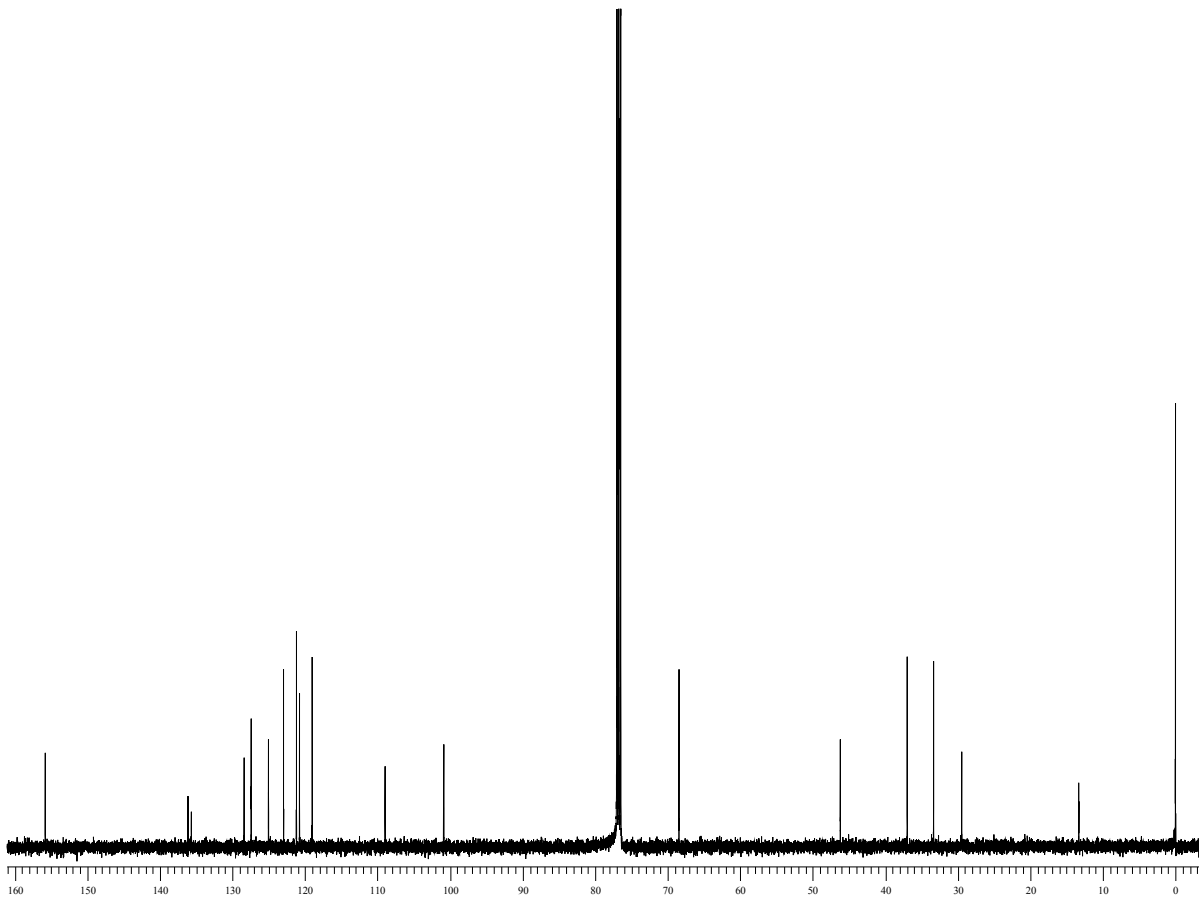

$^1\text{H}$  (500 MHz) and  $^{13}\text{C}$  (126 MHz) of compound **23** ( $\text{CDCl}_3$ )

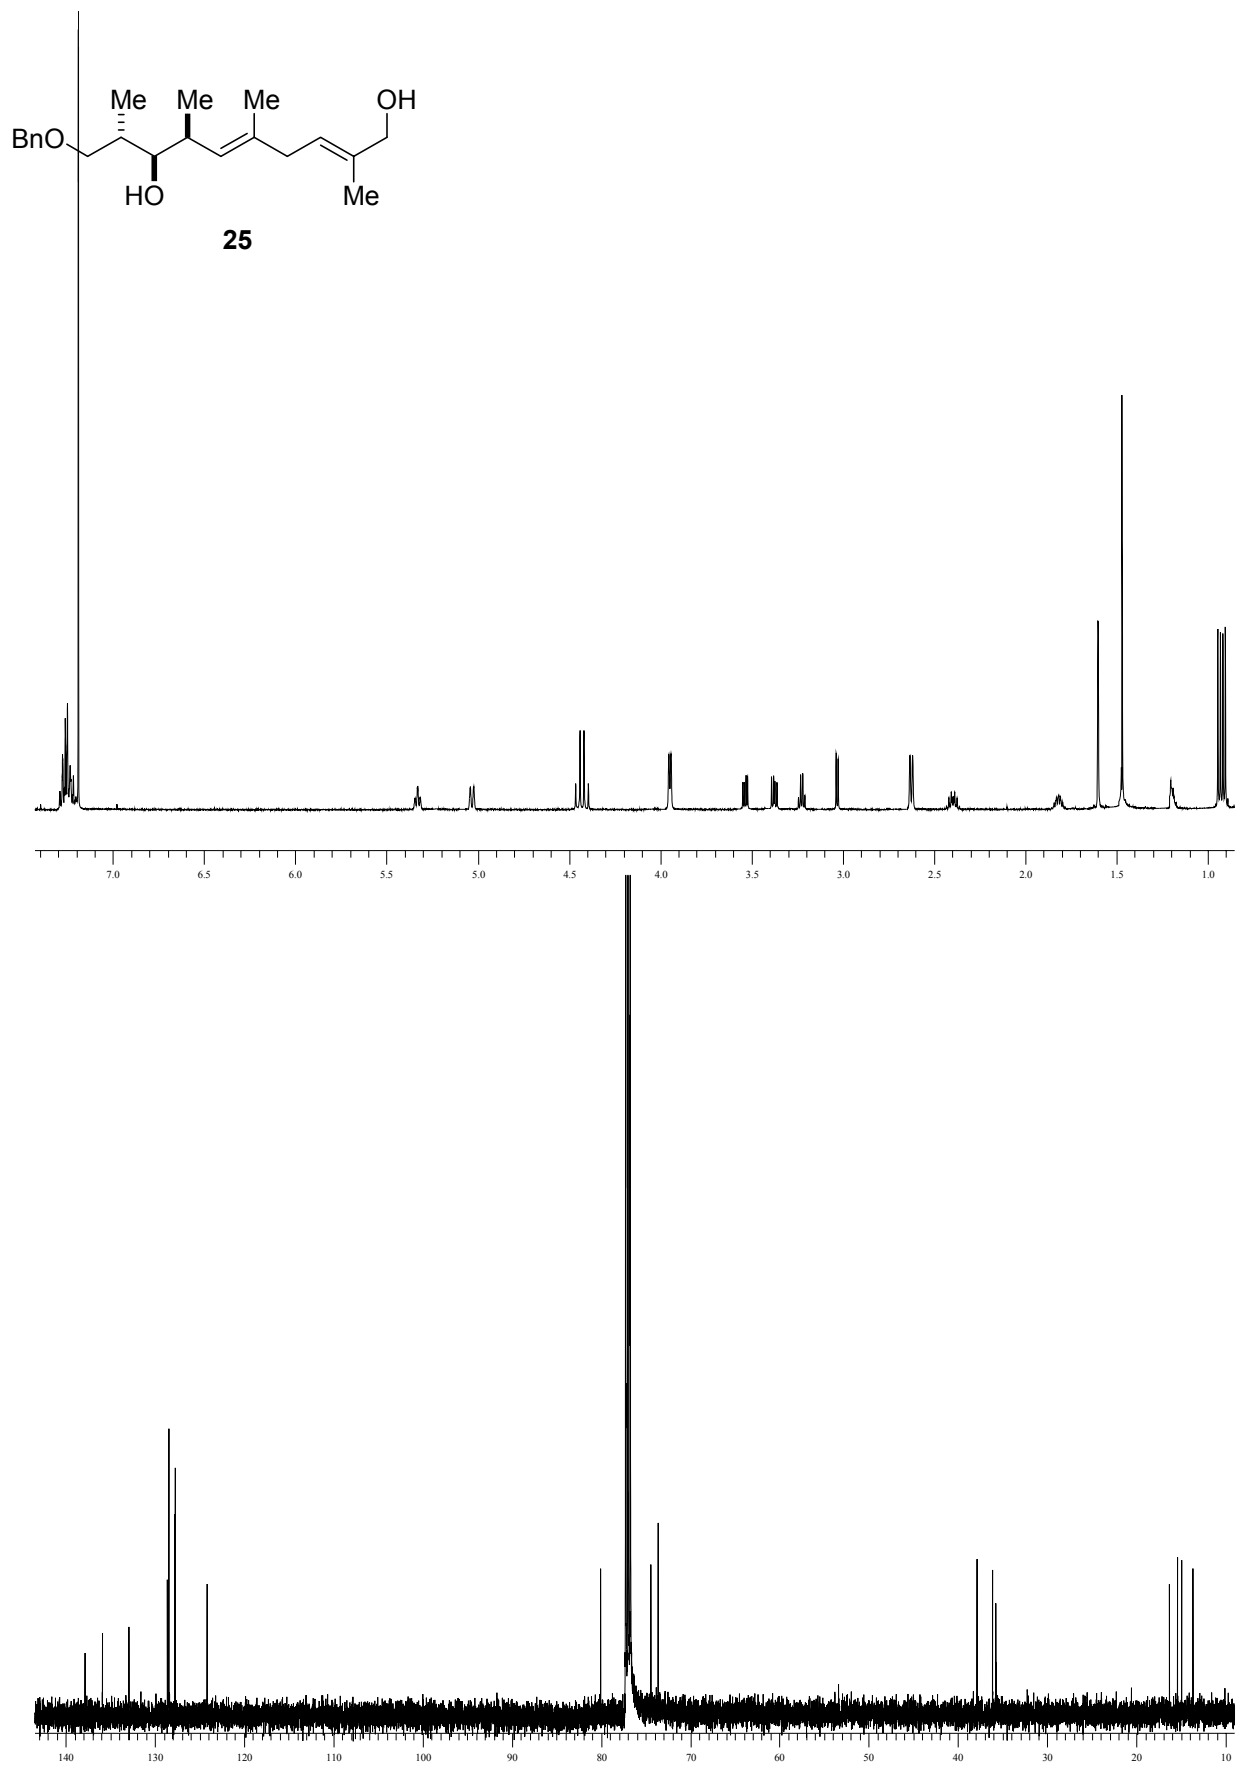

$^1\text{H}$  (500 MHz) and  $^{13}\text{C}$  (126 MHz) of compound **25** ( $\text{CDCl}_3$ )

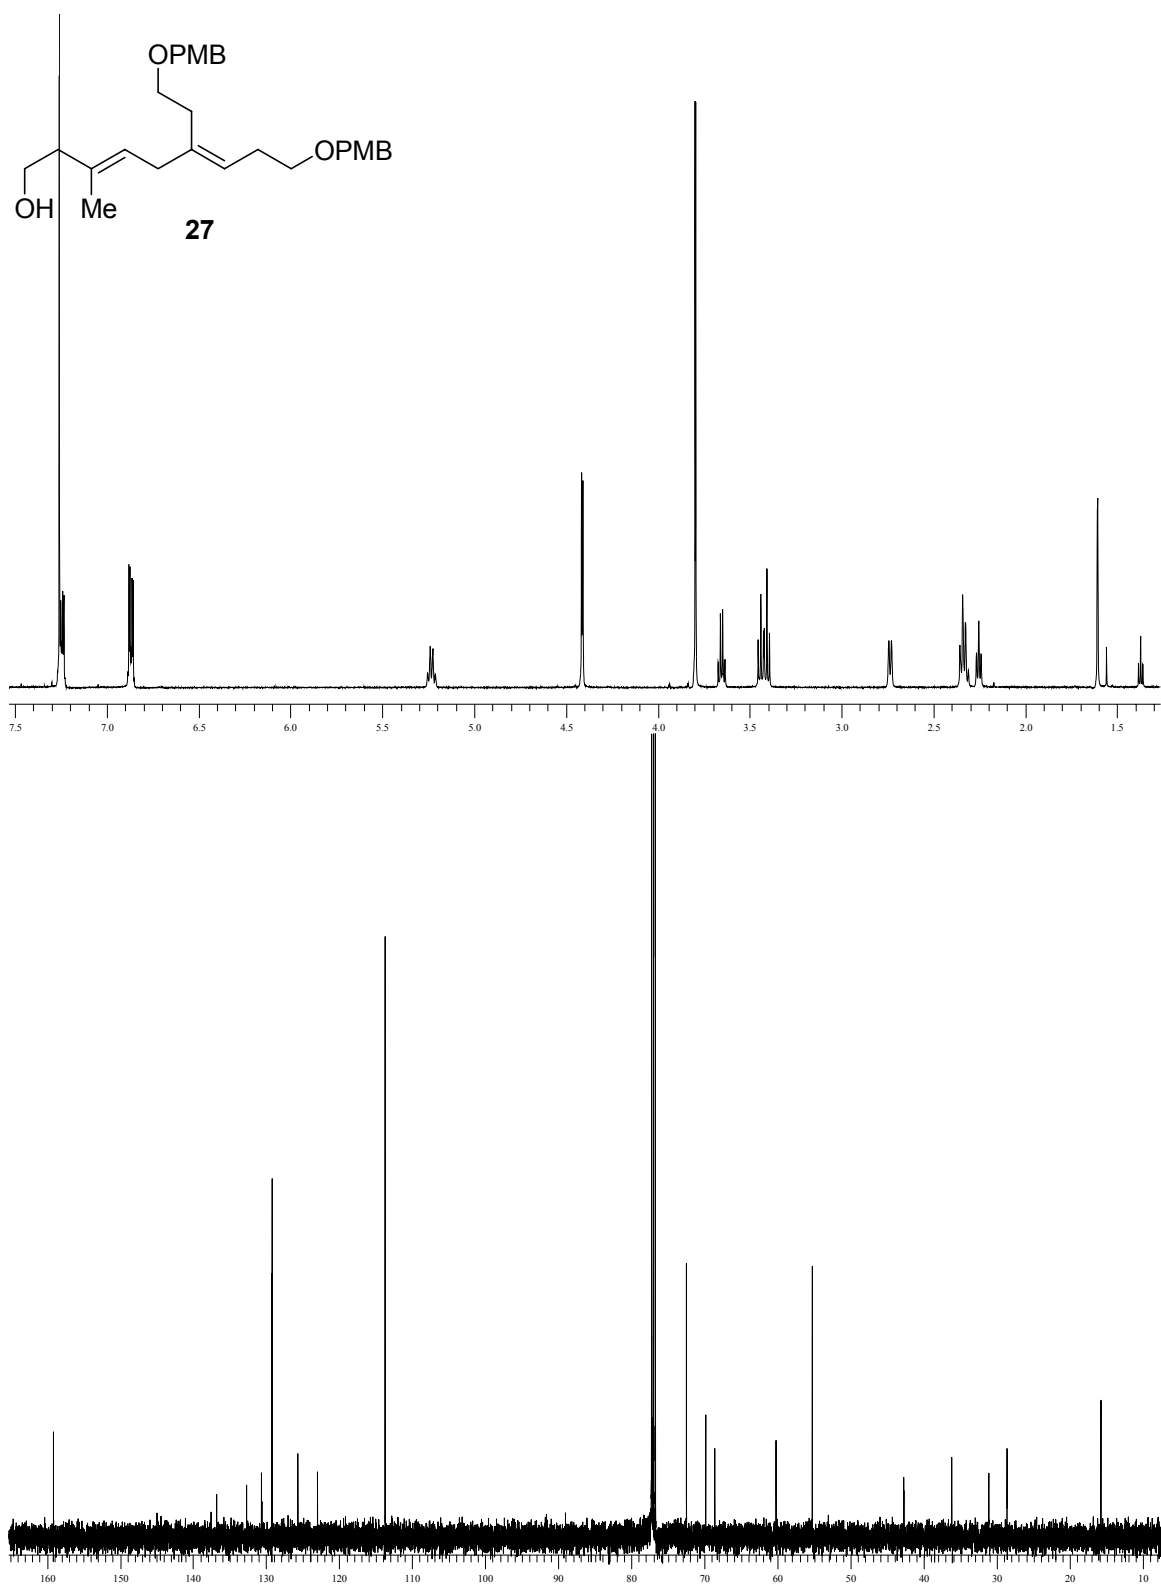

$^1\text{H}$  (500 MHz) and  $^{13}\text{C}$  (126 MHz) of compound **27** ( $\text{CDCl}_3$ )

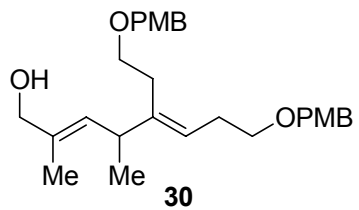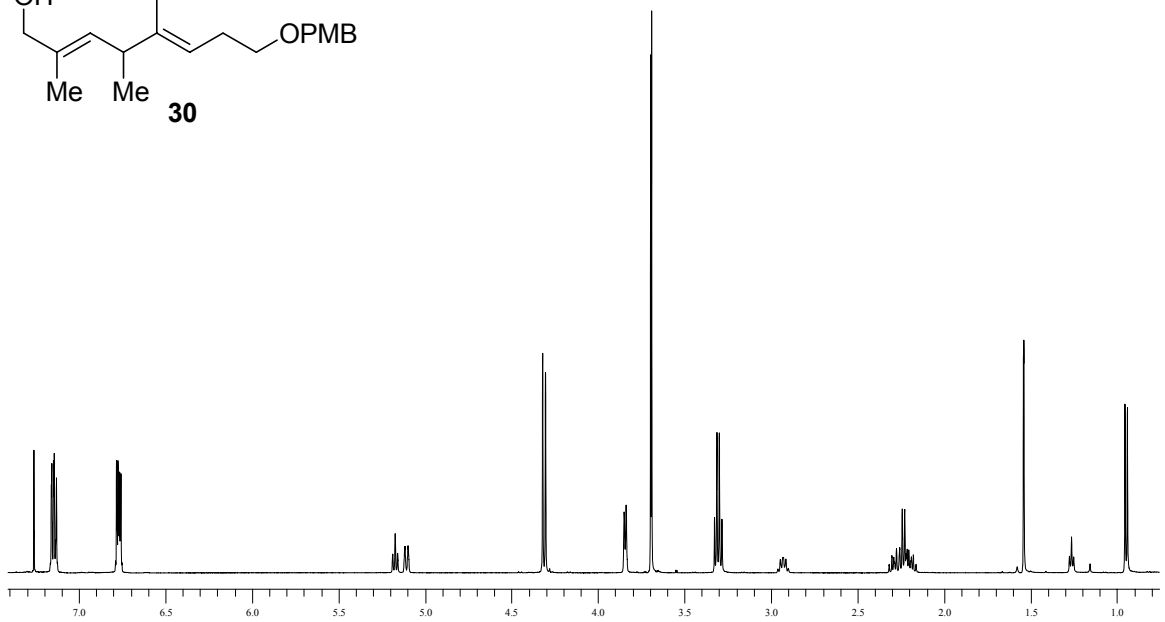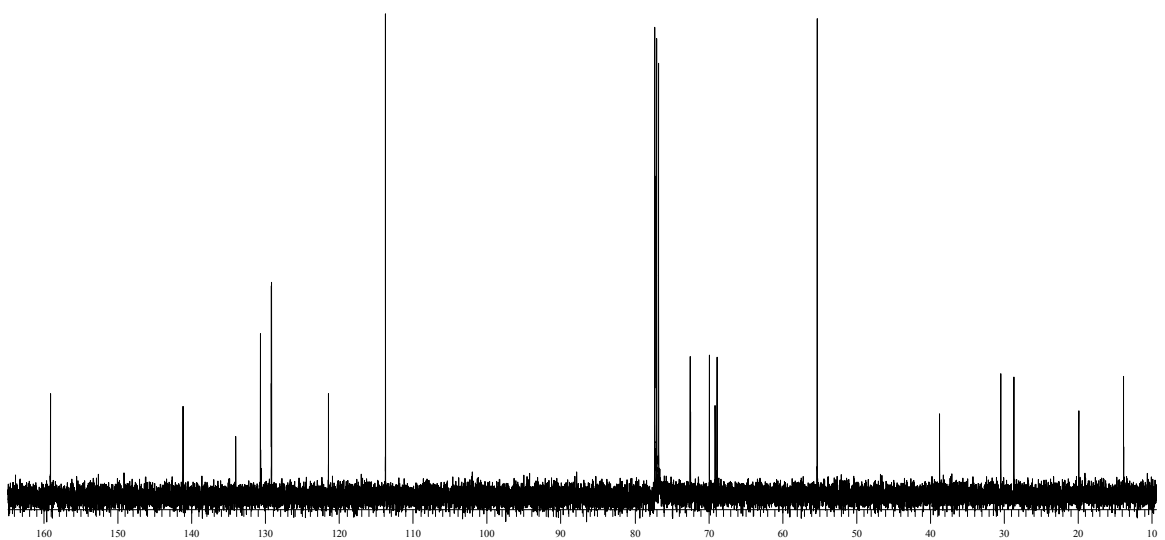

<sup>1</sup>H (500 MHz) and <sup>13</sup>C (100 MHz) of compound **30** (CDCl<sub>3</sub>)

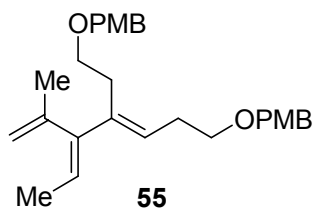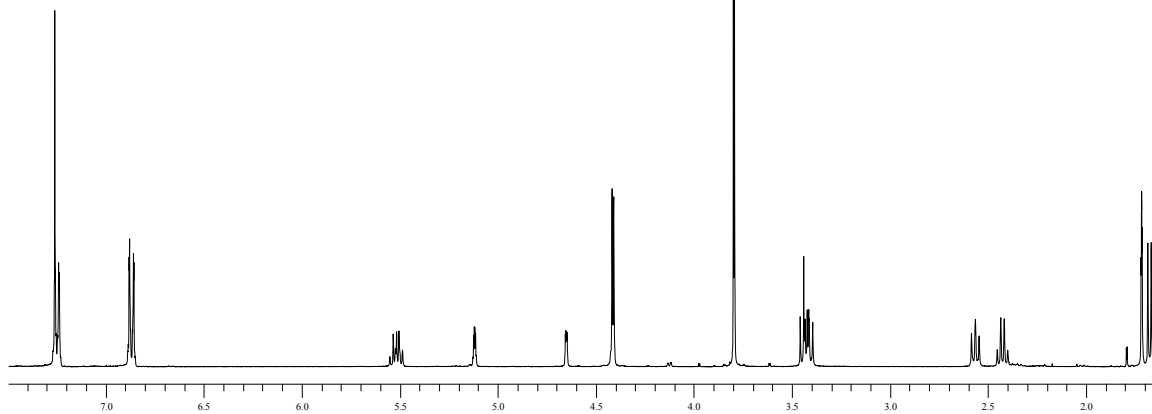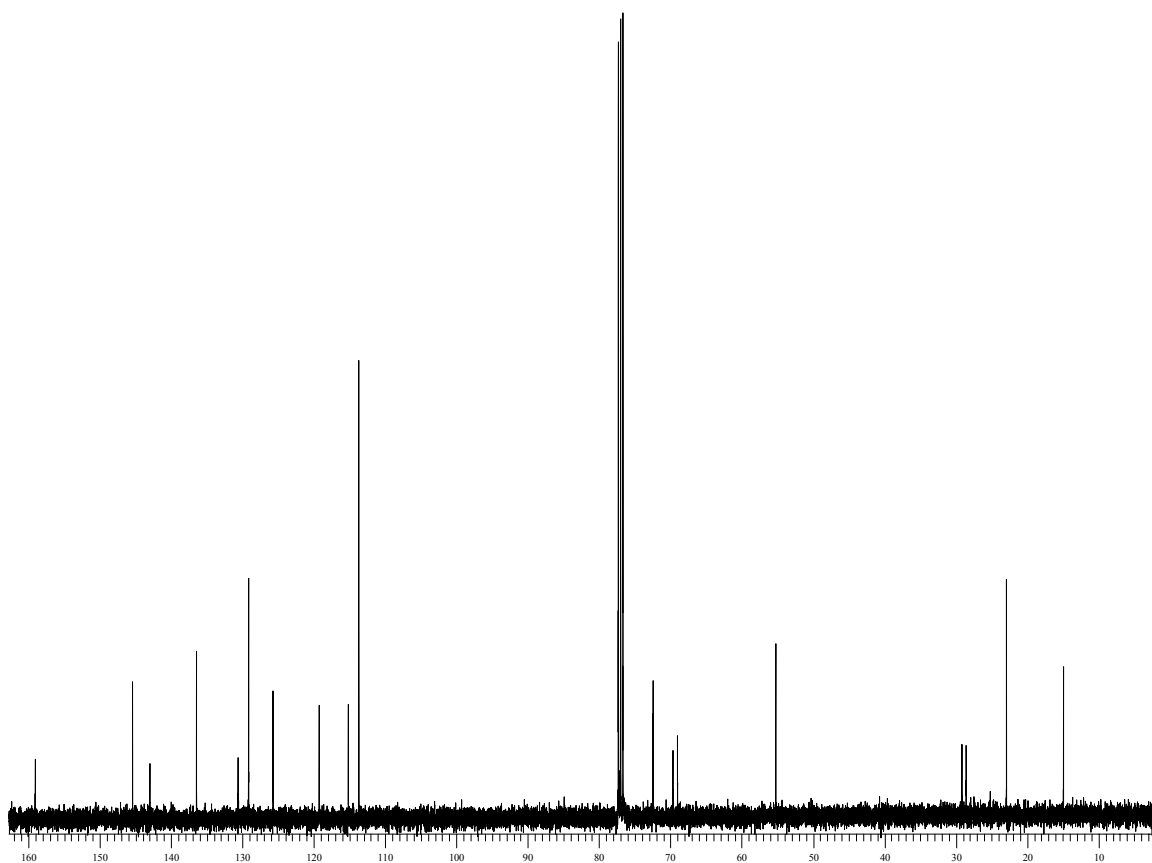

$^1\text{H}$  (400 MHz) and  $^{13}\text{C}$  (100 MHz) of compound **55** ( $\text{CDCl}_3$ )

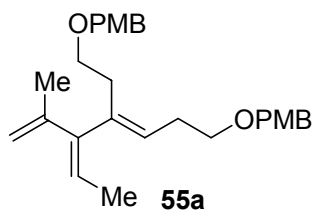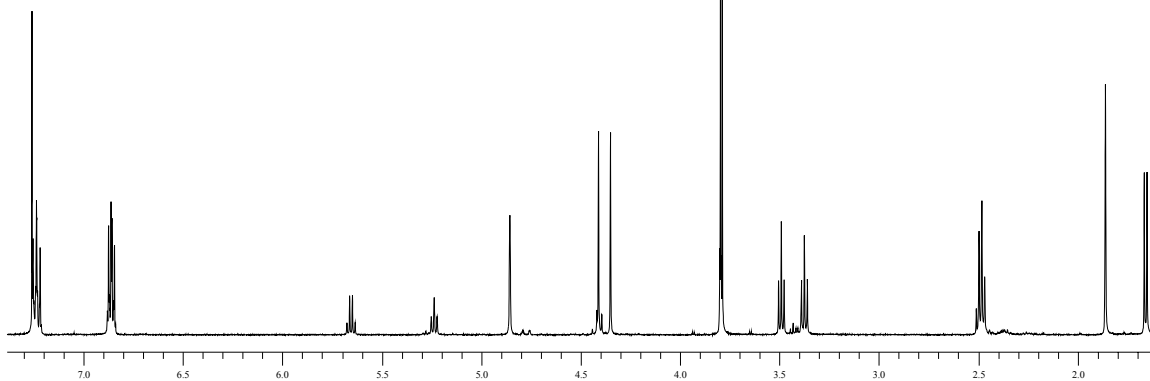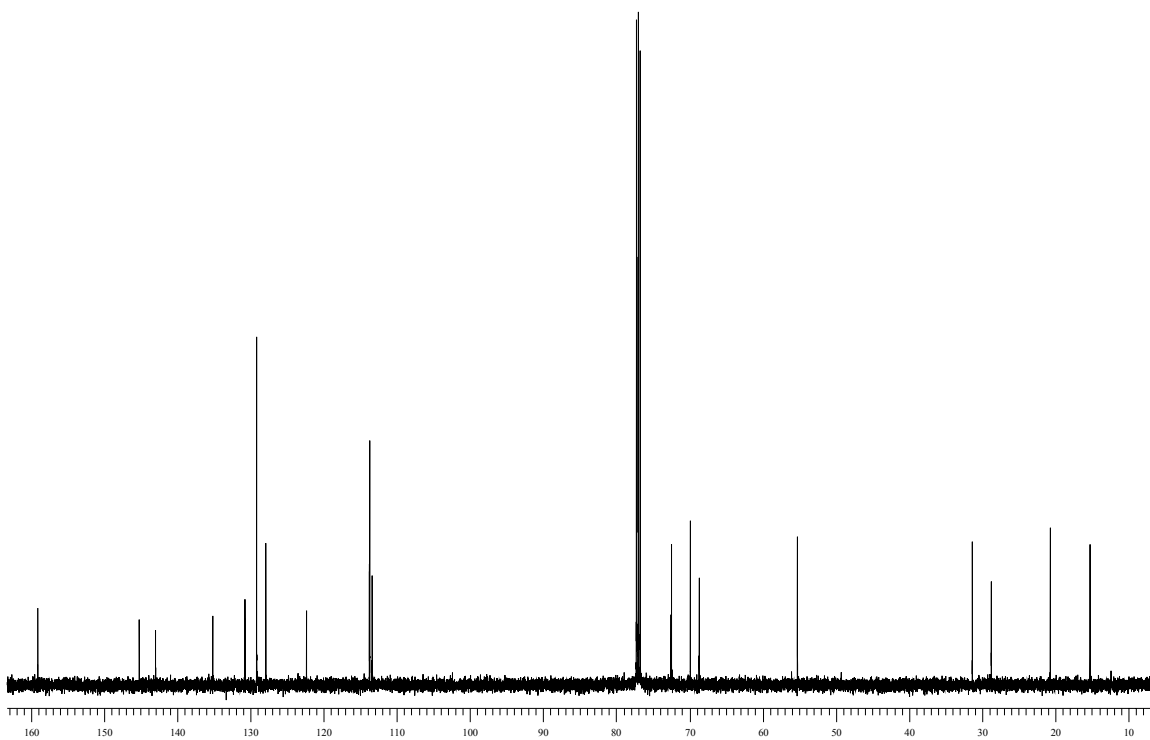

$^1\text{H}$  (500 MHz) and  $^{13}\text{C}$  (126 MHz) of compound **55a** ( $\text{CDCl}_3$ )

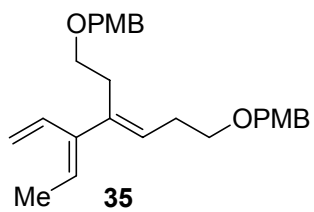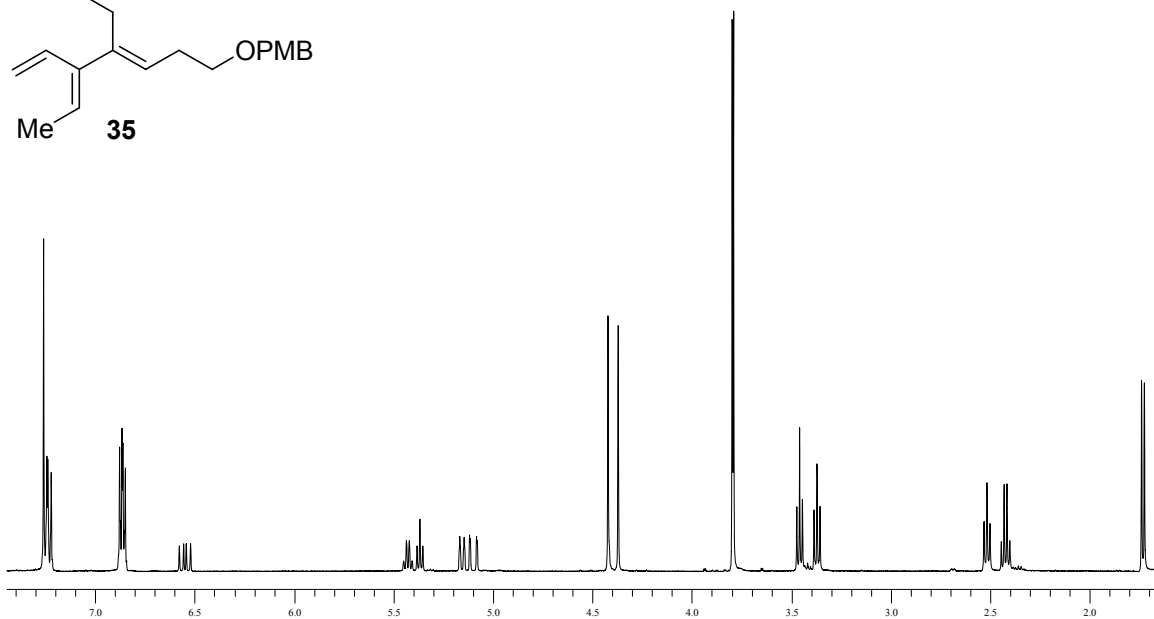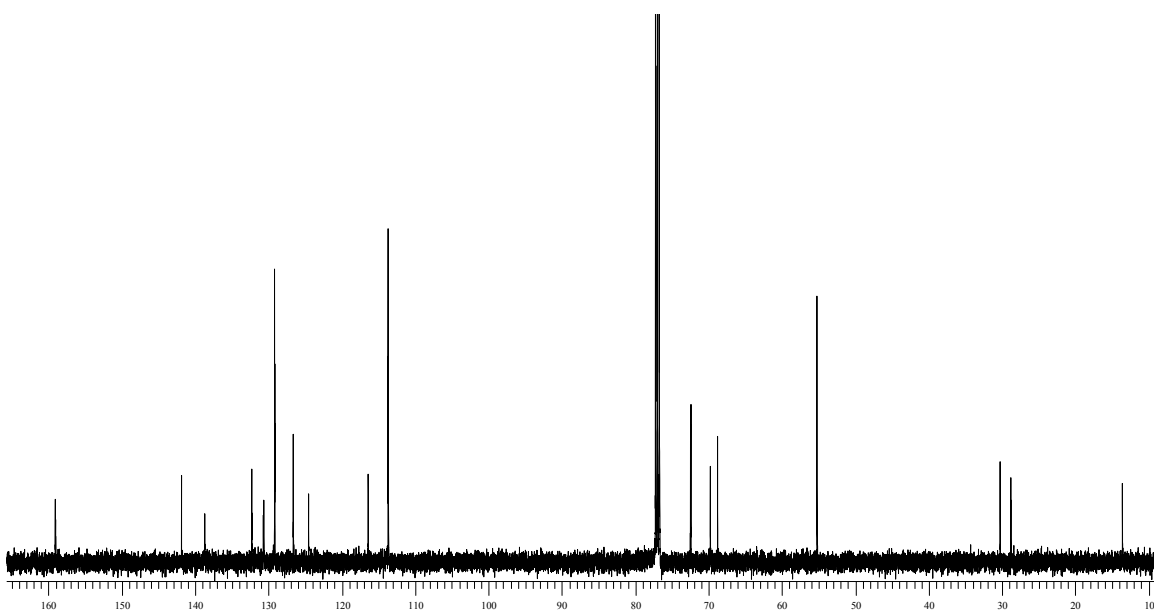

<sup>1</sup>H (500 MHz) and <sup>13</sup>C (126 MHz) of compound **35** (CDCl<sub>3</sub>)

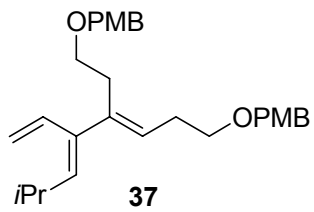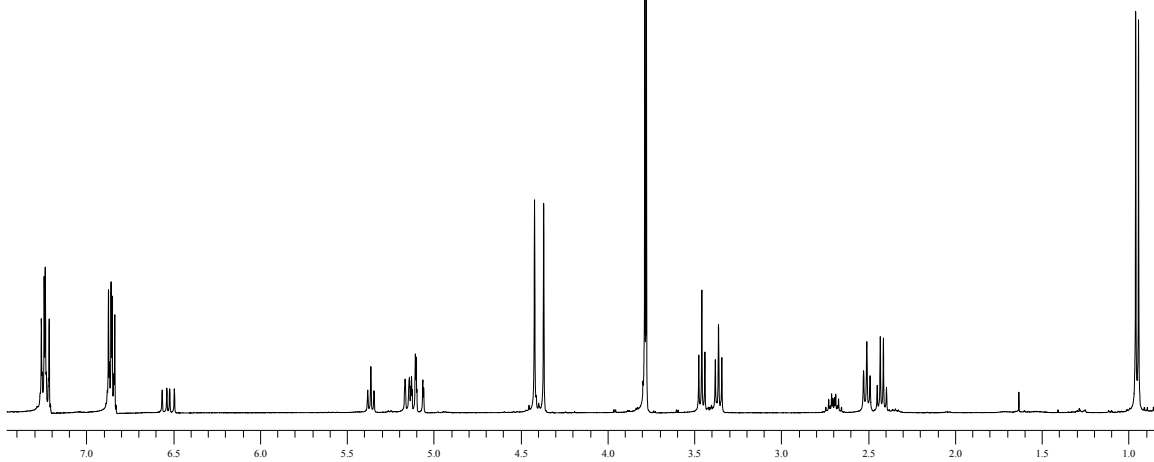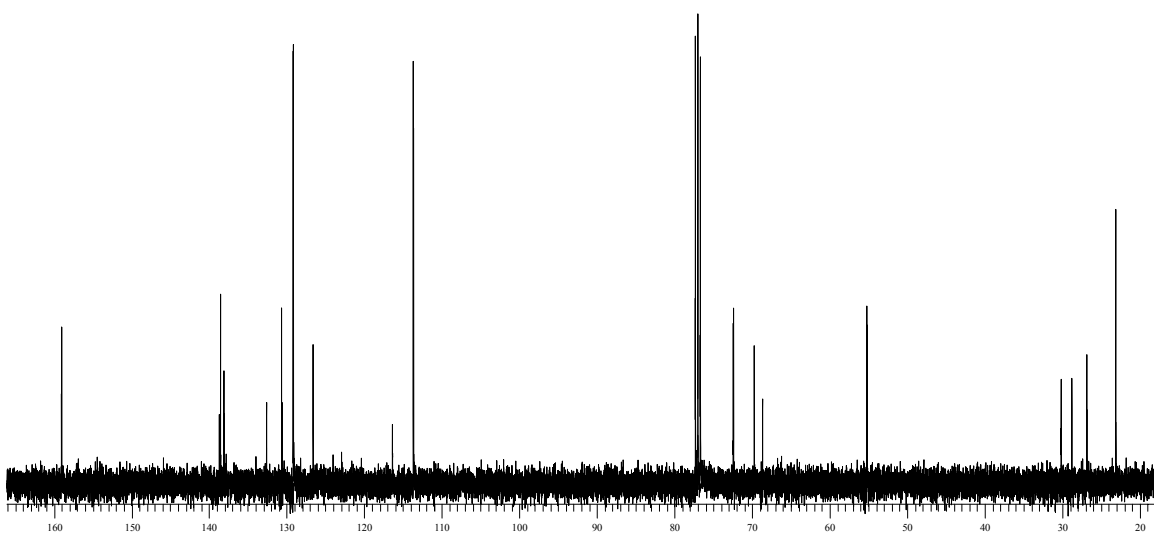

$^1\text{H}$  (400 MHz) and  $^{13}\text{C}$  (100 MHz) of compound **37** ( $\text{CDCl}_3$ )



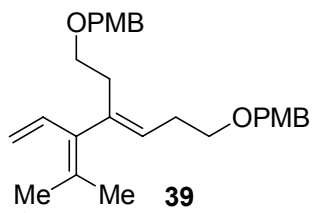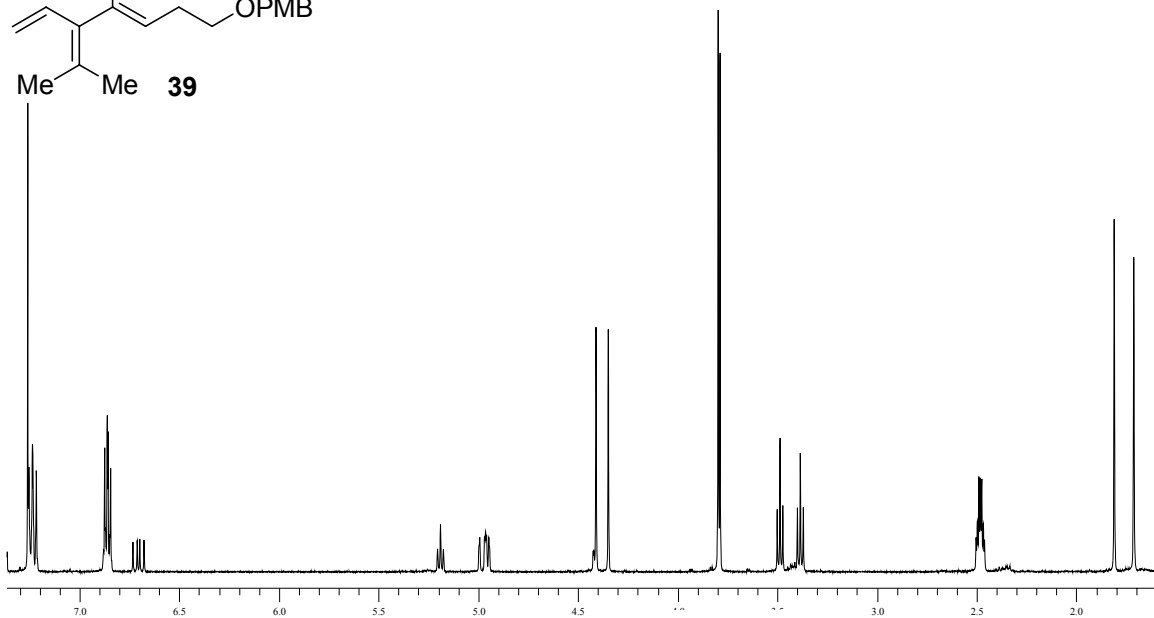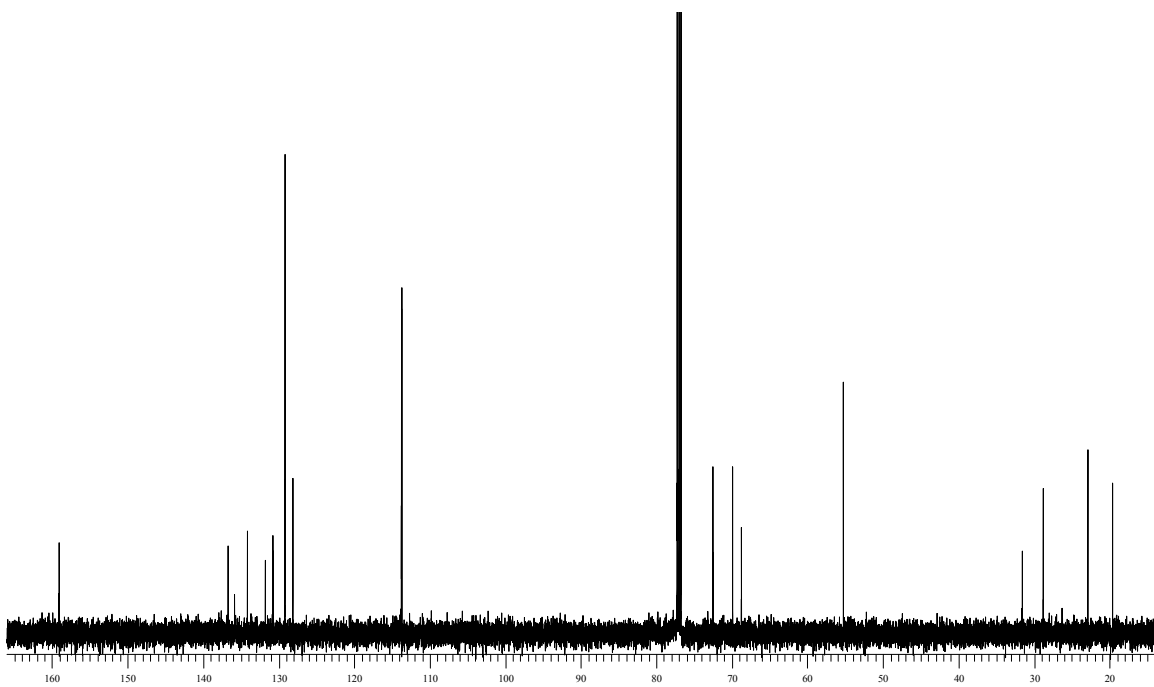

$^1\text{H}$  (500 MHz) and  $^{13}\text{C}$  (126 MHz) of compound **39** ( $\text{CDCl}_3$ )

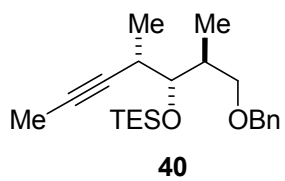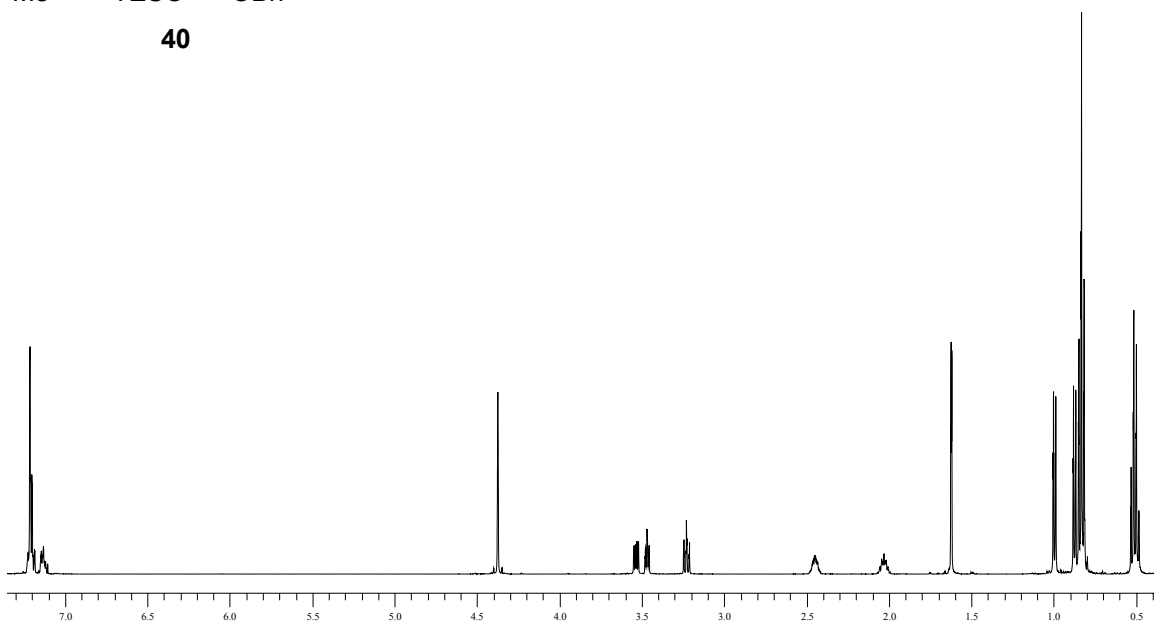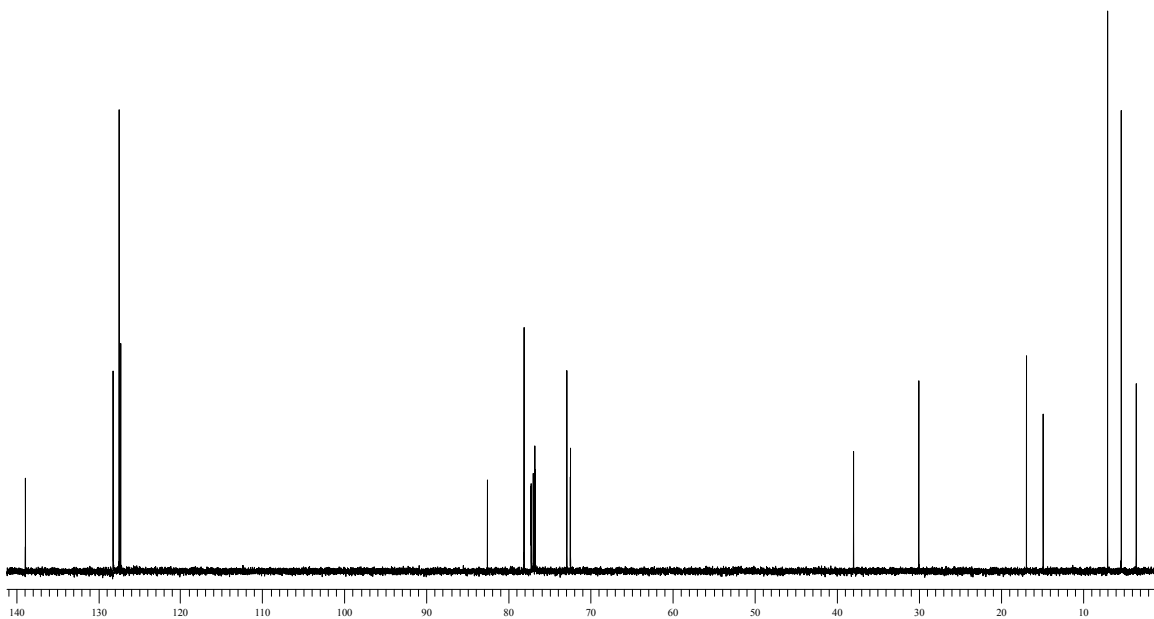

$^1\text{H}$  (500 MHz) and  $^{13}\text{C}$  (126 MHz) of compound **40** ( $\text{CDCl}_3$ )

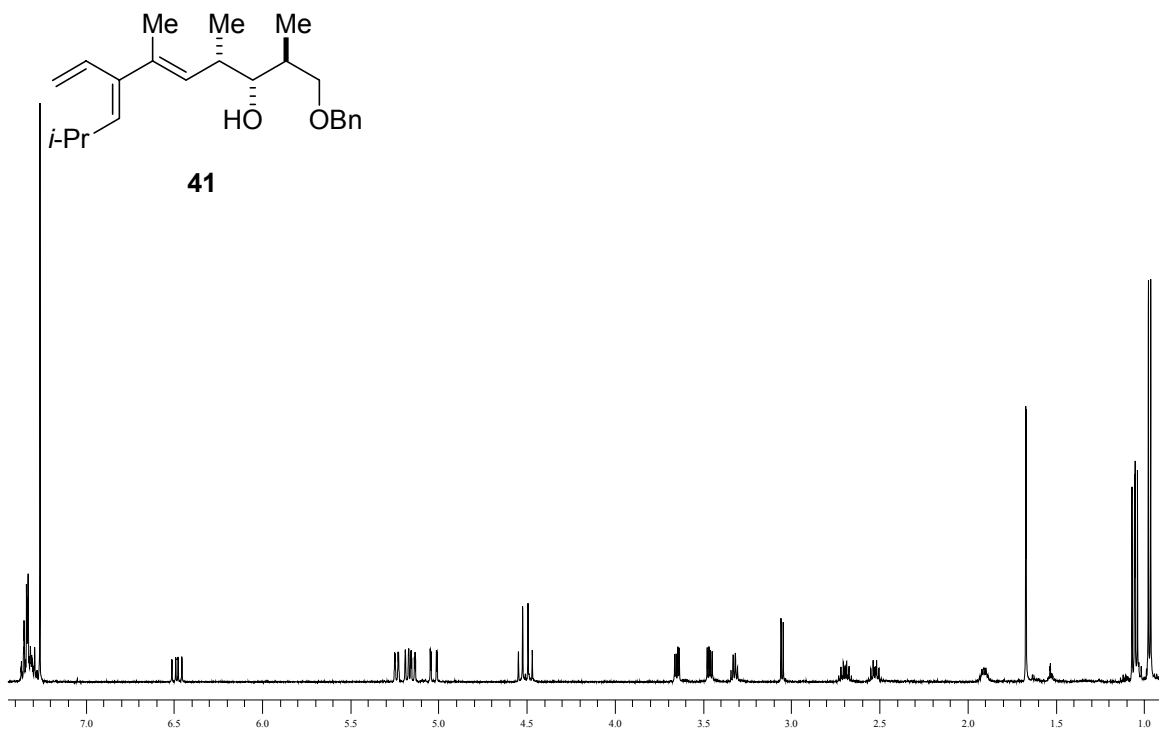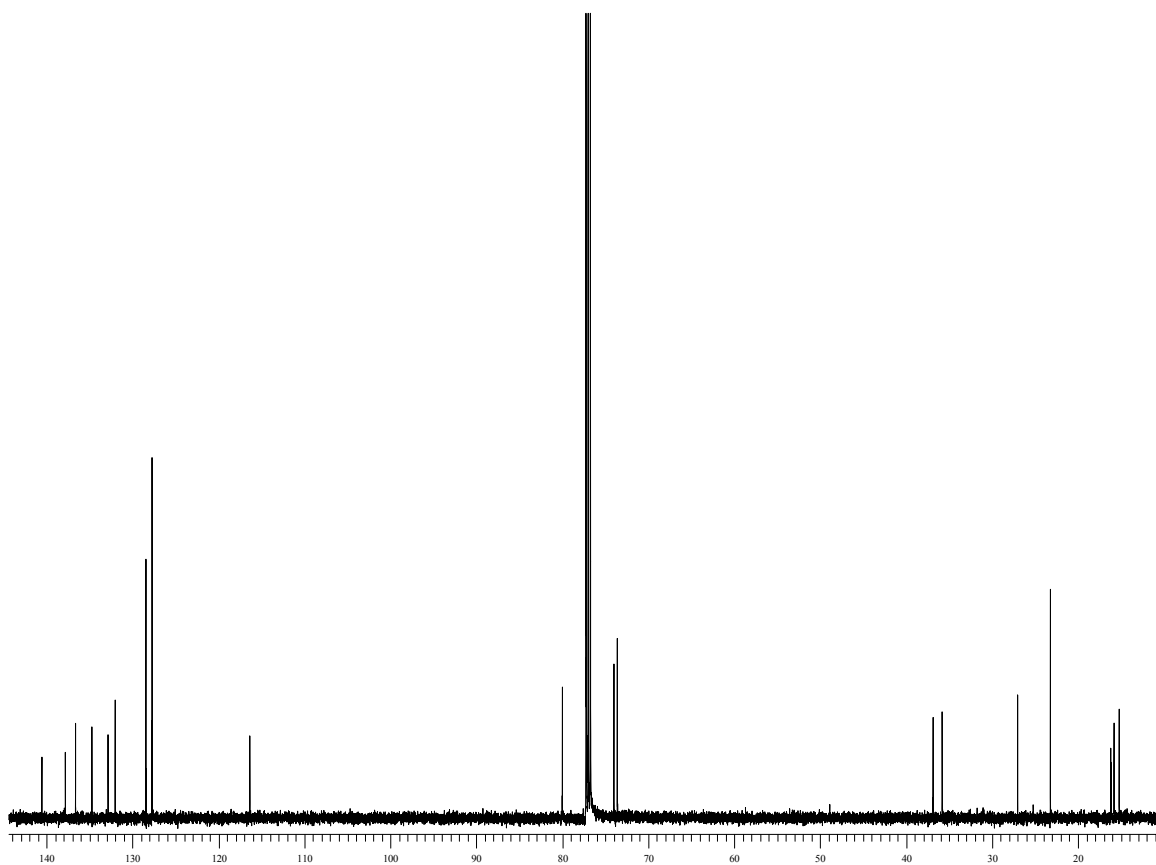

$^1\text{H}$  (500 MHz) and  $^{13}\text{C}$  (126 MHz) of compound **41** ( $\text{CDCl}_3$ )

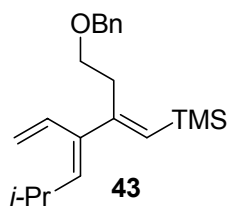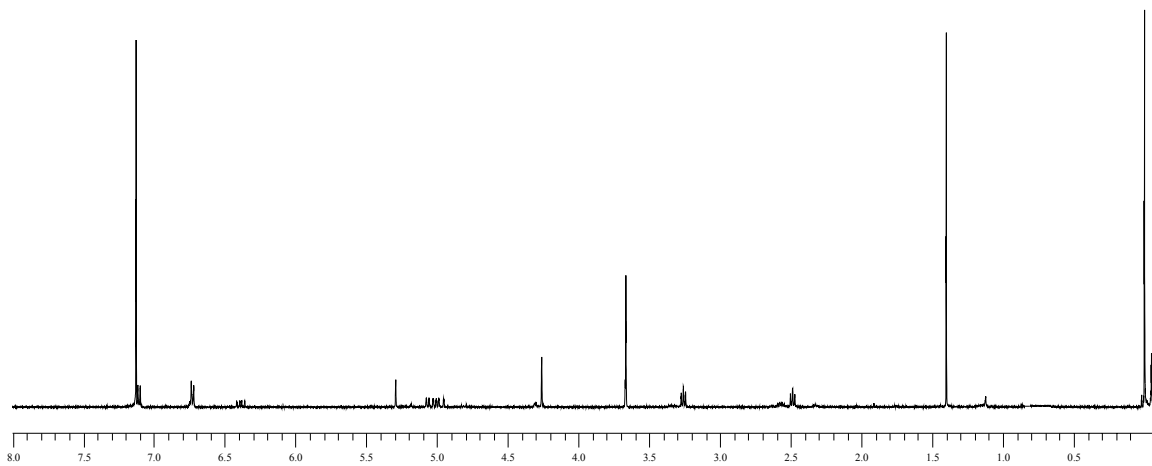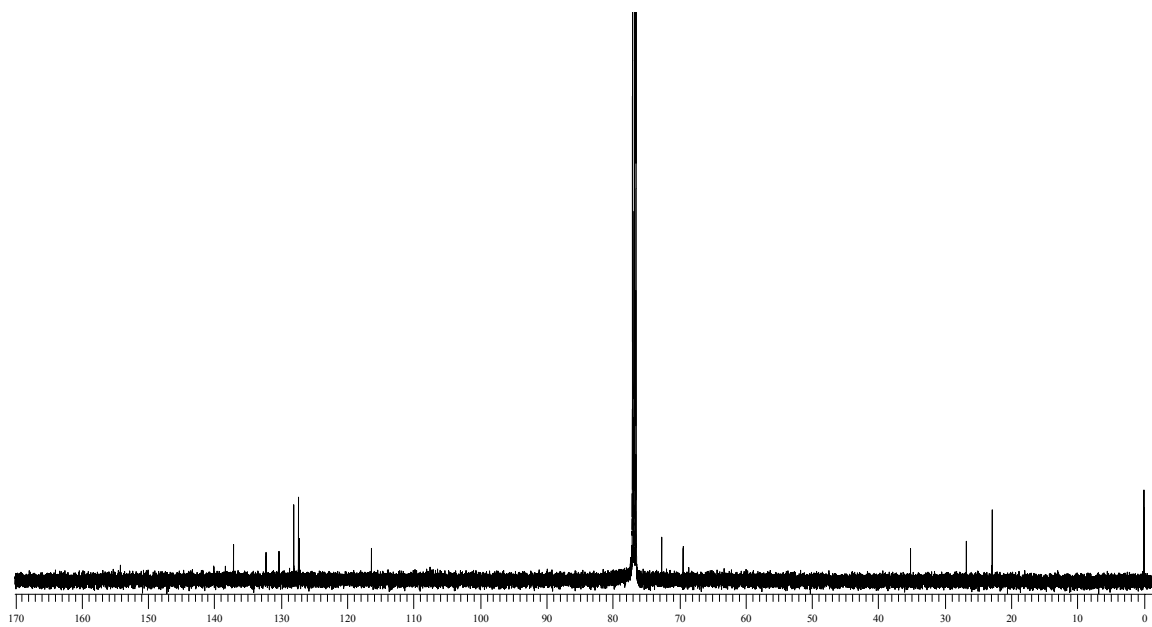

$^1\text{H}$  NMR (500 MHz) and  $^{13}\text{C}$  NMR (126 MHz) of compound **43** ( $\text{CDCl}_3$ )

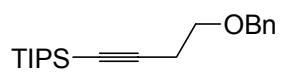

**44**

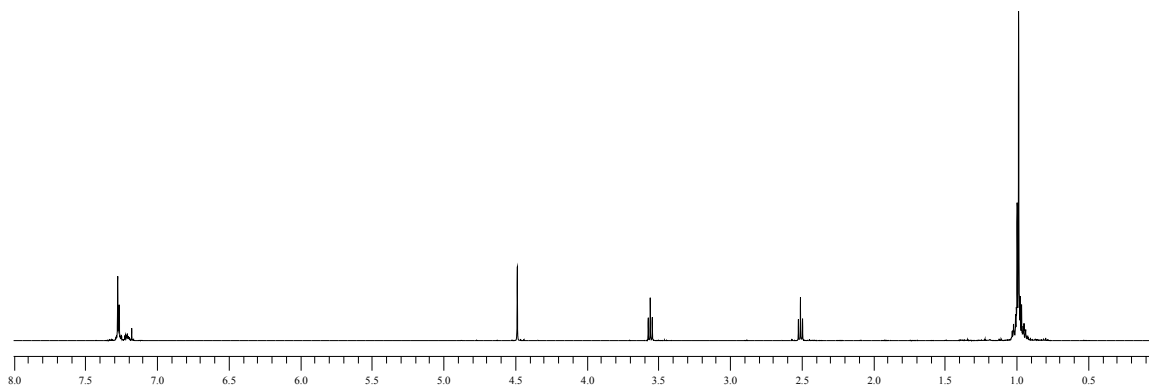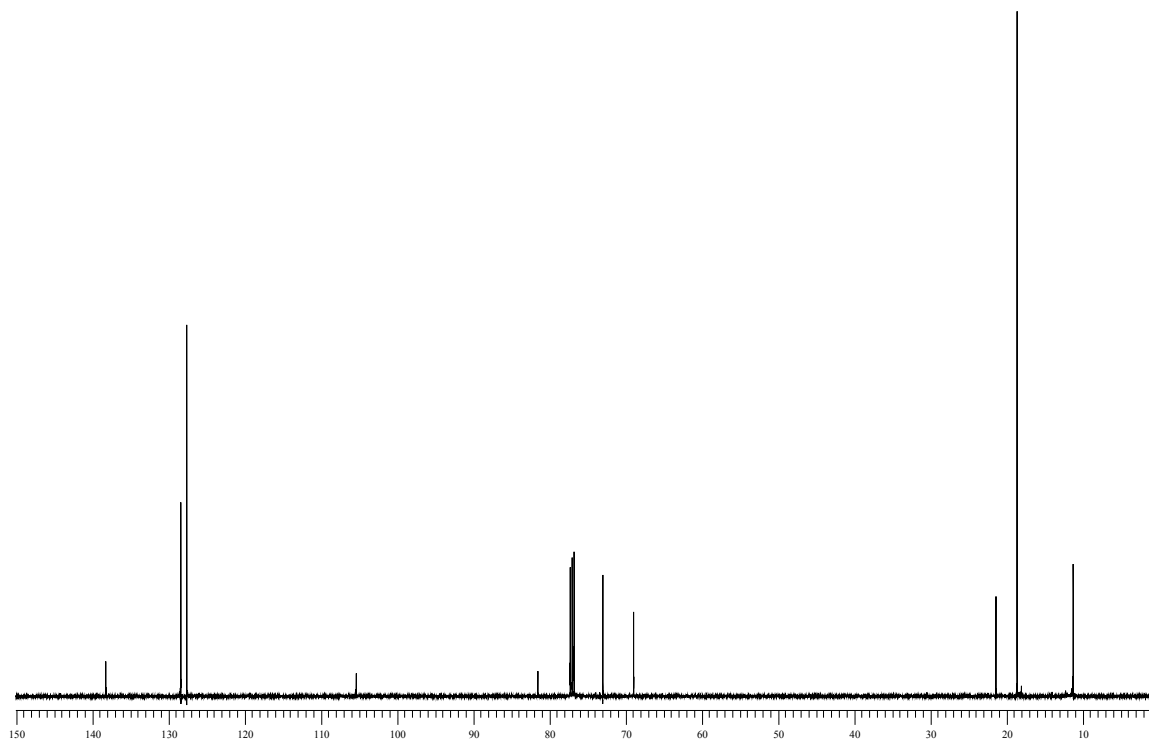

$^1\text{H}$  NMR (500 MHz) and  $^{13}\text{C}$  NMR (126 MHz) of compound **44** ( $\text{CDCl}_3$ )



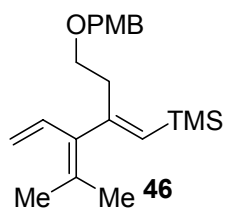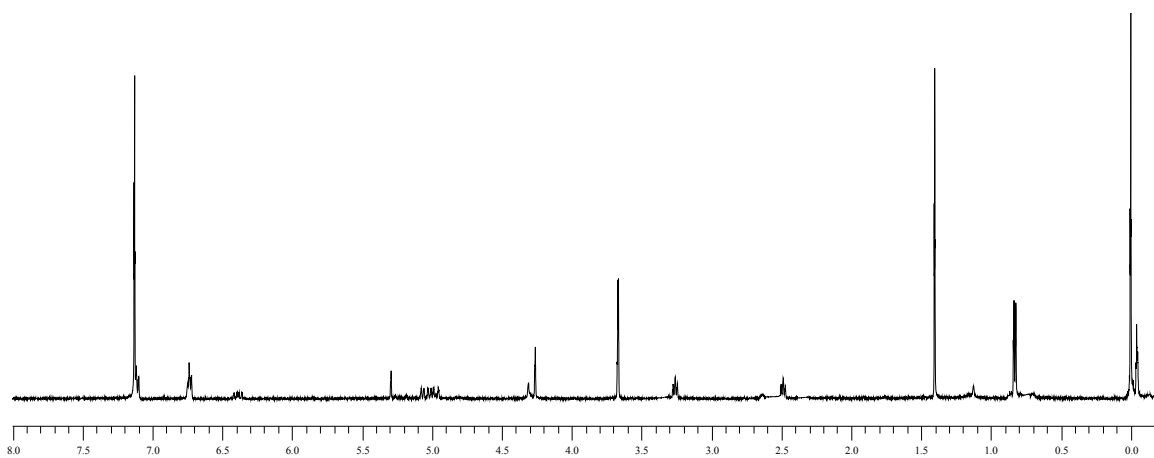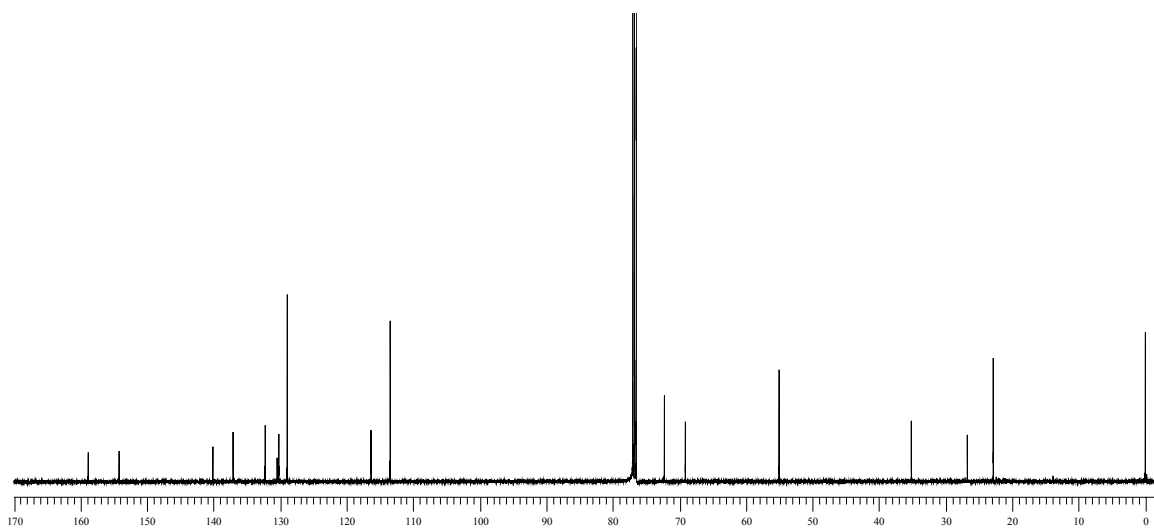

$^1\text{H}$  NMR (500 MHz) and  $^{13}\text{C}$  NMR (126 MHz) of compound **46** ( $\text{CDCl}_3$ )

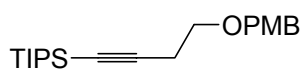

**47**

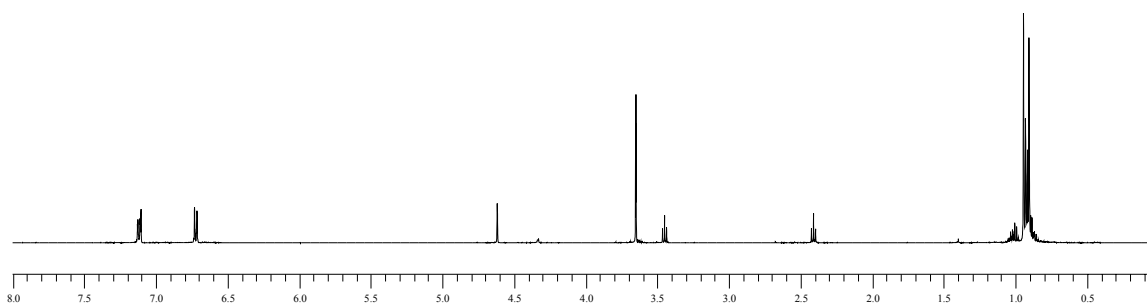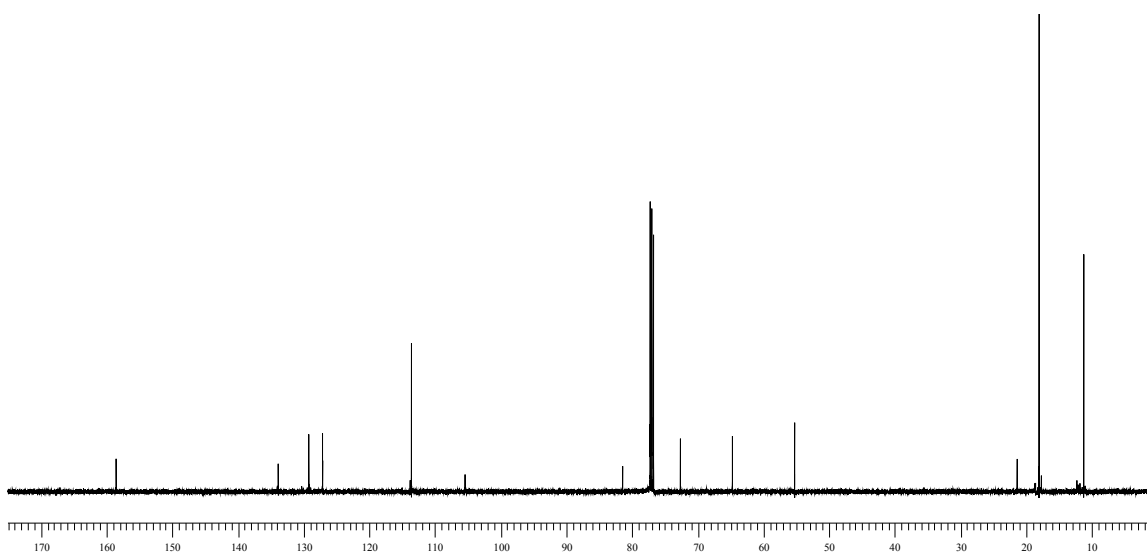

$^1\text{H}$  NMR (500 MHz) and  $^{13}\text{C}$  NMR (126 MHz) of compound **47** ( $\text{CDCl}_3$ )



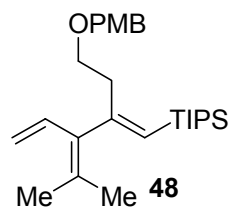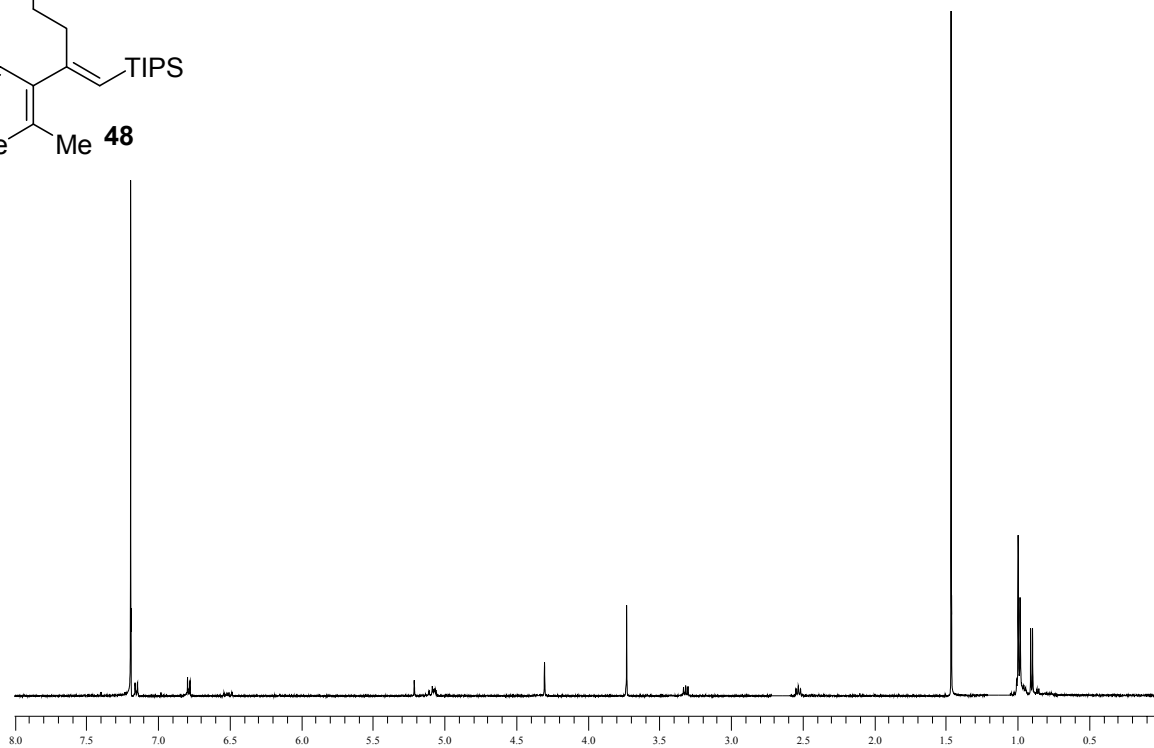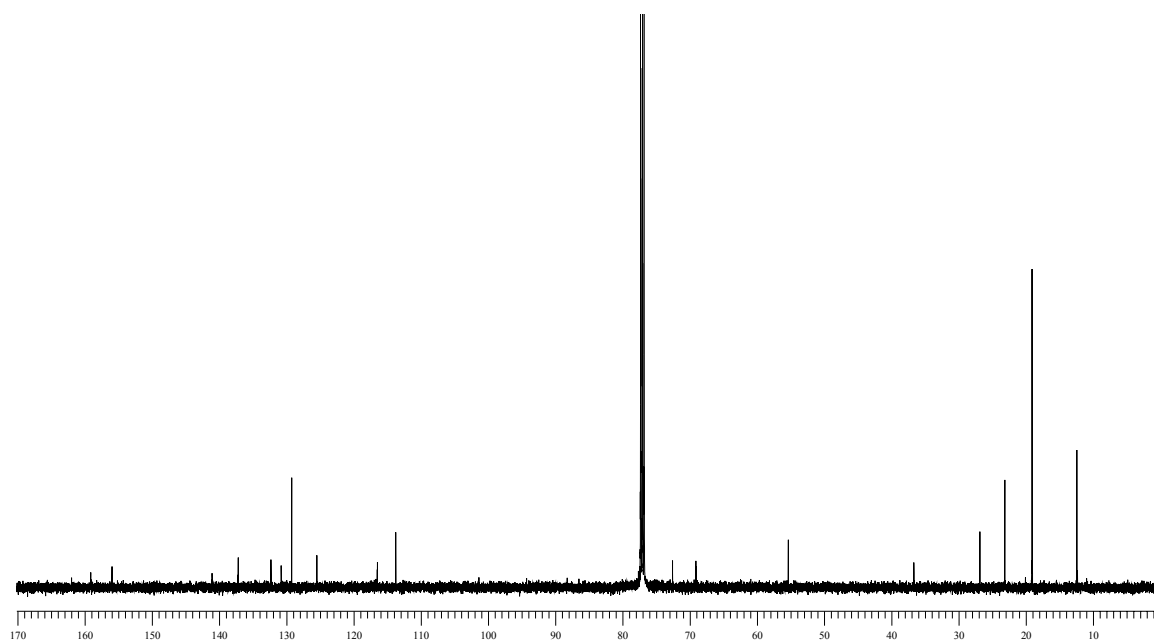

$^1\text{H}$  NMR (500 MHz) and  $^{13}\text{C}$  NMR (126 MHz) of compound **48** ( $\text{CDCl}_3$ )



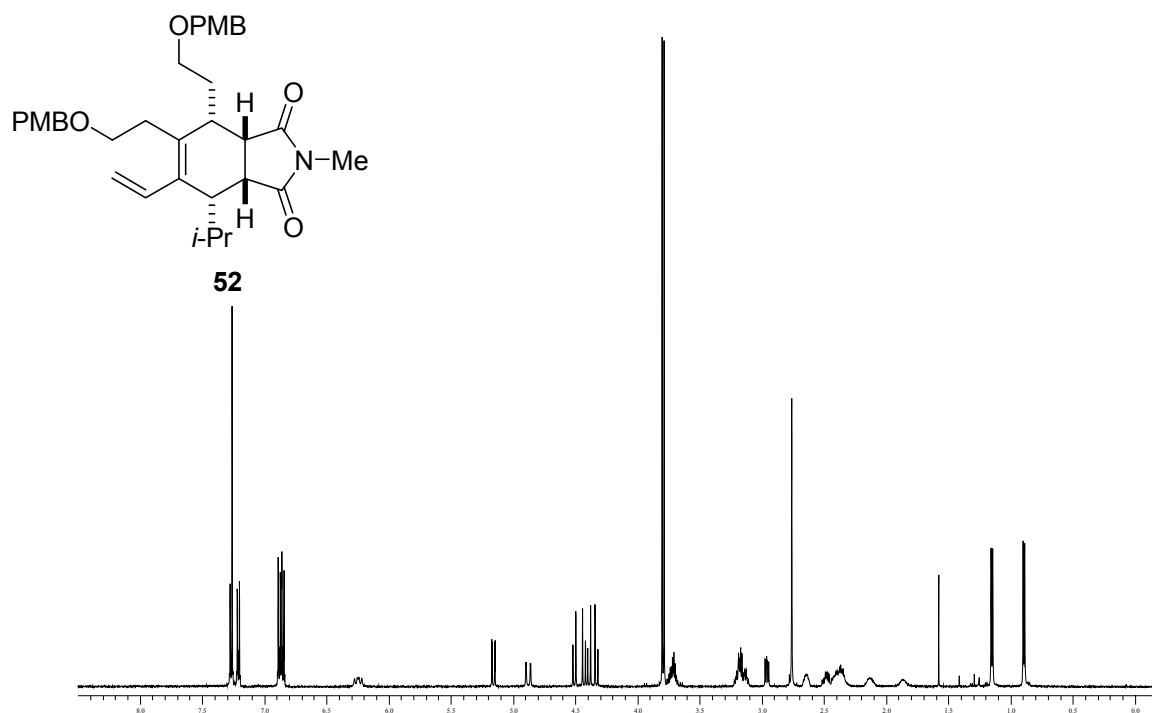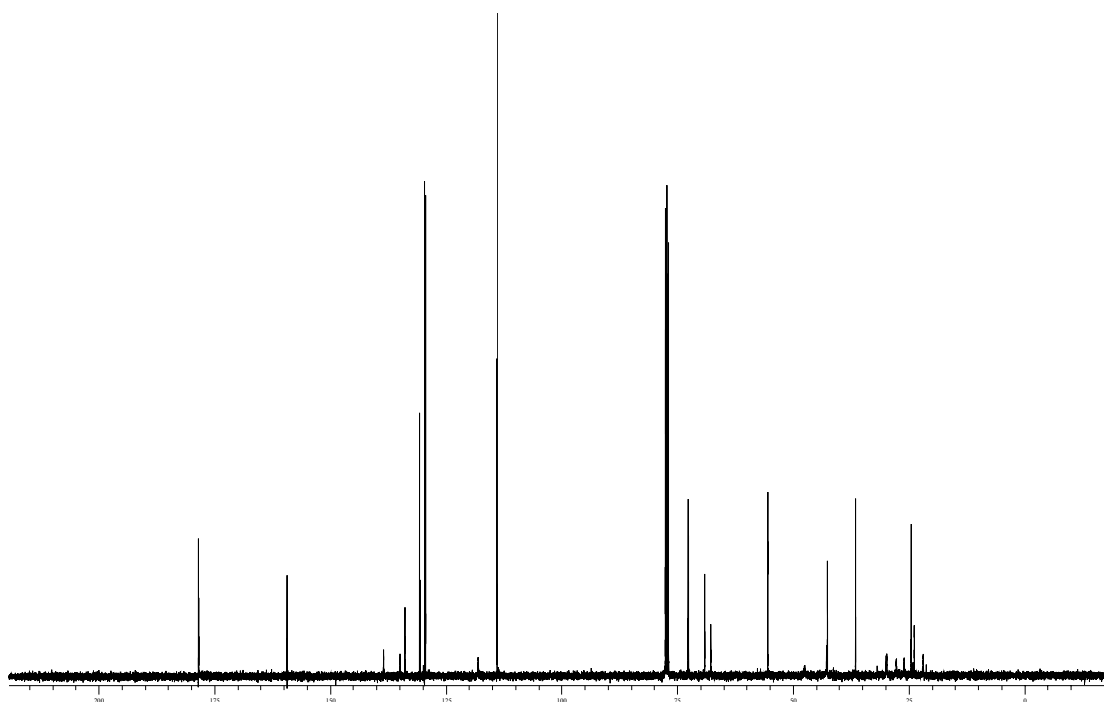

$^1\text{H}$  NMR (500 MHz) and  $^{13}\text{C}$  NMR (100 MHz) of compound **52** ( $\text{CDCl}_3$ )
